# Supplementary material for: Regulating Professional Players in Peer-to-Peer Markets: Evidence from Airbnb
Source: Atypon-hosted journal article supplement (doi:10.1287/mnsc.2022.4480), 2022-07-18
Supplement: mnsc.2022.4480.sm1.pdf [file mnsc.2022.4480.sm1.pdf]

**Web Appendix for “Regulating Professional Players in  
Peer-to-Peer Markets: Evidence from Airbnb”**

Wei Chen

Eller College of Management, the University of Arizona, Tucson, AZ 85721; weichen@arizona.edu

Zaiyan Wei

Krannert School of Management, Purdue University, West Lafayette, IN 47907; zaiyan@purdue.edu

Karen Xie

Daniels College of Business, University of Denver, Denver, CO 80208; karen.xie@du.edu

## A1. A Summary of Tests

For easy reference, we summarize all of the analyses conducted in this paper. We begin by comparing the properties of professional hosts with properties operated by nonprofessional hosts. We then present a balance check of our PSM sample. To detect the roles of professional hosts, we also depict the price distributions of properties operated by professional hosts and nonprofessional hosts. These descriptive analyses provide important insights for our estimation of the policy impacts to determine the roles of professional hosts.

We begin our formal estimations by investigating the premise of the policy (i.e., to restrict the supply of professional hosts). We then test the roles of professional hosts by investigating the policy impacts on various market outcomes (e.g., supply, price levels, and reservations). Analyses of the moderating roles of price dispersion on policy impacts in heterogeneous markets provide further insights into the roles of professional hosts. We conclude with managerial implications of our findings (primarily for the platform) by studying the policy effects and the moderating effects of price dispersion on performance metrics such as the total reservations and the total revenue on the platform.

To validate the main findings, we rule out several possible alternative explanations and conduct a rich set of robustness checks. The findings remain consistent with the main results, suggesting that our results are unlikely biased in these various scenarios.

**Table A1. A Summary of Tests**

| Category                         | Tests                                                                                 | Location |
|----------------------------------|---------------------------------------------------------------------------------------|----------|
| Understanding Professional Hosts | Comparing properties managed by professional and nonprofessional hosts                | Table 2  |
|                                  | Price distribution of properties managed by professional and nonprofessional hosts    | Figure 1 |
| Comparability                    | Comparability between affected and unaffected zip codes                               | Table 3  |
|                                  | Comparing policy-affected and unaffected zip codes—before matching                    | Table A2 |
| The Premise of the Policy        | Policy effects on the supply of professional hosts                                    | Table 4  |
|                                  | Policy effects on the fraction of professional hosts                                  | Table A3 |
| Policy Impacts                   | Policy effects on the supply                                                          | Table 5  |
|                                  | Policy effects on the price levels                                                    | Table 6  |
|                                  | Policy effects on the prices and reservations of top and bottom nonprofessional hosts | Table 7  |
| Heterogeneity                    | Moderating effects of price dispersion on the supply                                  | Table 8  |
|                                  | Moderating effects of price dispersion on the prices                                  | Table 9  |

(Table continues on the next page.)

|                                     |                                                                                                                              |           |
|-------------------------------------|------------------------------------------------------------------------------------------------------------------------------|-----------|
| Managerial Implications             | Policy effects on total reservations and revenue and the moderation of price dispersion                                      | Table 10  |
| Ruling out Alternative Explanations | Policy effects on the supply excluding relisted properties                                                                   | Table A4  |
|                                     | Policy effects on prices excluding relisted properties                                                                       | Table A5  |
|                                     | Policy effects on the supply and prices of entrants                                                                          | Table A6  |
|                                     | Property-level analyses: policy effects on prices                                                                            | Table A7  |
|                                     | Placebo tests of the simulated policy effect on the supply                                                                   | Figure A1 |
|                                     | Placebo tests of the simulated policy effect on the prices                                                                   | Figure A2 |
| Robustness Checks                   | Relative time model for the supply                                                                                           | Table A8  |
|                                     | Relative time model for the price levels                                                                                     | Table A9  |
|                                     | Policy effects on the supply using the full sample                                                                           | Table A10 |
|                                     | Policy effects on the prices using the full sample                                                                           | Table A11 |
|                                     | Comparability between affected and unaffected zip codes using the alternatively matched sample                               | Table A12 |
|                                     | Policy effects on the supply using the alternatively matched sample                                                          | Table A13 |
|                                     | Policy effects on the prices using the alternatively matched sample                                                          | Table A14 |
|                                     | Policy effects on the supply using the sample without San Francisco                                                          | Table A15 |
|                                     | Policy effects on the prices using the sample without San Francisco                                                          | Table A16 |
|                                     | Policy effects on the supply excluding entire home properties sharing the same address                                       | Table A17 |
|                                     | Policy effects on the prices excluding entire home properties sharing the same address                                       | Table A18 |
|                                     | Comparing properties managed by professional and nonprofessional hosts using an alternative definition of professional hosts | Table A19 |
|                                     | Policy effects on the supply using an alternative definition of professional hosts                                           | Table A20 |
|                                     | Policy effects on the prices using an alternative definition of professional hosts                                           | Table A21 |
|                                     | Policy effects on the prices controlling for the total supply                                                                | Table A22 |
|                                     | Policy effects on the supply controlling for Airbnb characteristics                                                          | Table A23 |
|                                     | Policy effects on the prices controlling for Airbnb characteristics                                                          | Table A24 |
|                                     | Policy effects on the reservations (median)                                                                                  | Table A25 |
|                                     | Policy effects on the revenue (median)                                                                                       | Table A26 |

**A2. Balance Check on the Full Sample before Matching**

In this section, we report the summary statistics (same set as those in Table 3 in the paper) before matching. As expected, most variables are not statistically similar (balanced) before matching.

**Table A2. Comparing Policy-Affected and Unaffected Zip Codes—Before Matching**

|                               | 266 affected<br>zip codes |        | 268 unaffected<br>zip codes |        | Mean<br>Difference | <i>p</i> -value |
|-------------------------------|---------------------------|--------|-----------------------------|--------|--------------------|-----------------|
|                               | Mean                      | SD     | Mean                        | SD     |                    |                 |
| Total properties (logged)     | 4.168                     | 1.810  | 3.960                       | 1.604  | 0.208              | 1.876e-08       |
| Population (logged)           | 10.408                    | 0.852  | 10.145                      | 0.975  | 0.263              | < 2.2e-16       |
| # Households (logged)         | 9.460                     | 0.803  | 9.188                       | 0.907  | 0.272              | < 2.2e-16       |
| Median family income (logged) | 11.000                    | 0.454  | 10.948                      | 0.503  | 0.052              | 7.236e-07       |
| Unemployment rate             | 8.883                     | 4.155  | 9.474                       | 4.778  | -0.591             | 1.119e-09       |
| House vacancy rate            | 8.863                     | 5.026  | 8.732                       | 5.865  | 0.131              | 0.269           |
| % White population            | 37.547                    | 24.289 | 37.678                      | 25.180 | -0.131             | 0.808           |
| % Hispanic population         | 17.456                    | 14.449 | 17.866                      | 17.717 | -0.410             | 0.241           |
| % Female                      | 51.388                    | 3.611  | 50.360                      | 4.233  | 1.028              | < 2.2e-16       |

### A3. Policy Effects on the Fraction of Professional Hosts

We have shown a decline in the supply of professional hosts due to the policy (as in Table 4). To further establish the premise of the policy, we provide a robustness check by estimating the policy impact on the fraction of professional hosts. We adopt two measures: (1) the fraction of professional host properties among all properties in a zip code in a month and (2) the fraction of professional host accounts among all hosts in a zip code in a month. Table A3 exhibits the results. We find that the fractions of professional host properties and their accounts both reduced significantly in the policy-affected markets. These results further demonstrate the policy's effectiveness in restricting professional hosts.

**Table A3. Policy Effects on the Fraction of Professional Hosts**

| DVs:                                                                     | The fraction of Professional Hosts (%) |                       |
|--------------------------------------------------------------------------|----------------------------------------|-----------------------|
|                                                                          | (1)<br>% Properties                    | (2)<br>% Hosts        |
| 1(Policy) <sub>it</sub>                                                  | -0.0203***<br>(0.0067)                 | -0.0119**<br>(0.0051) |
| <i>ACS Controls: Local socioeconomic and demographic characteristics</i> |                                        |                       |
| Population (logged)                                                      | 0.0724<br>(0.1238)                     | 0.1984**<br>(0.0990)  |
| # Households (logged)                                                    | 0.1837<br>(0.1369)                     | -0.1093<br>(0.1087)   |
| Median family income (logged)                                            | 0.0121<br>(0.0520)                     | -0.0482<br>(0.0398)   |
| Unemployment rate                                                        | -0.0001<br>(0.0029)                    | -0.0018<br>(0.0021)   |
| House vacancy rate                                                       | 0.0037*<br>(0.0022)                    | 0.0030**<br>(0.0015)  |
| % White population                                                       | 0.0009<br>(0.0020)                     | 0.0017<br>(0.0016)    |
| % Hispanic population                                                    | -0.0005<br>(0.0026)                    | -0.0014<br>(0.0019)   |
| % Female                                                                 | 0.0014<br>(0.0027)                     | 0.0007<br>(0.0020)    |
| Zip code FE                                                              | Yes                                    | Yes                   |
| Year-by-month FE                                                         | Yes                                    | Yes                   |
| City time trends                                                         | Yes                                    | Yes                   |
| Observations                                                             | 14,163                                 | 14,163                |
| Adj. R-squared                                                           | 0.7482                                 | 0.7142                |

\*  $p < 0.1$ ; \*\*  $p < 0.05$ ; \*\*\*  $p < 0.01$ . Robust standard errors clustered at the zip code level are shown in parentheses.

All continuous variables are winsorized at 1% and 99% levels.

**A4. Tables and Figures Ruling out the Alternative Explanations in Section 5.6.1**

This section presents a series of findings that rule out alternative explanations discussed in Section 5.6.1. We begin by ruling out the possibility that professional hosts' potential relisting behavior would bias the policy impacts (Tables A4 and A5). We then show evidence that the policy impacts are not biased by new entrants (Table A6). Table A7 reports the price change on the property level, which helps us identify the mechanism for the policy's impact on price levels. Lastly, we conduct placebo tests to ensure that the policy drives the results rather than other factors not captured by the policy (Figures A1 – A2).

**Table A4. Policy Effect on Supply Excluding Relisted Properties**

|                                                                          | Supply of<br>Nonprofessional Hosts |                        | Supply of<br>Professional Hosts |                       | Total Supply           |                        |
|--------------------------------------------------------------------------|------------------------------------|------------------------|---------------------------------|-----------------------|------------------------|------------------------|
|                                                                          | (1)<br># Properties                | (2)<br># Hosts         | (3)<br># Properties             | (4)<br># Hosts        | (5)<br># Properties    | (6)<br># Hosts         |
| DVs: (All logged)                                                        |                                    |                        |                                 |                       |                        |                        |
| 1(Policy) <sub>it</sub>                                                  | 0.0397*<br>(0.0221)                | 0.0513**<br>(0.0212)   | -0.0835***<br>(0.0280)          | -0.0357*<br>(0.0209)  | 0.0036<br>(0.0200)     | 0.0327*<br>(0.0193)    |
| <i>ACS Controls: Local socioeconomic and demographic characteristics</i> |                                    |                        |                                 |                       |                        |                        |
| Population (logged)                                                      | -0.1007<br>(0.5485)                | -0.1943<br>(0.5115)    | 0.6753<br>(0.6246)              | 1.4486***<br>(0.5022) | -0.0257<br>(0.5322)    | 0.0370<br>(0.4966)     |
| # Households (logged)                                                    | -0.3936<br>(0.6475)                | -0.3005<br>(0.6185)    | 0.6809<br>(0.6971)              | -0.8603*<br>(0.4910)  | 0.0020<br>(0.6292)     | -0.4325<br>(0.5869)    |
| Median family income (logged)                                            | -0.5424**<br>(0.2246)              | -0.5311***<br>(0.2041) | -0.2632<br>(0.2798)             | -0.5039**<br>(0.2147) | -0.5433**<br>(0.2313)  | -0.6007***<br>(0.2005) |
| Unemployment rate                                                        | -0.0354***<br>(0.0101)             | -0.0294***<br>(0.0086) | -0.0258*<br>(0.0138)            | -0.0244**<br>(0.0103) | -0.0337***<br>(0.0096) | -0.0309***<br>(0.0084) |
| House vacancy rate                                                       | -0.0119<br>(0.0095)                | -0.0142<br>(0.0088)    | 0.0078<br>(0.0103)              | 0.0068<br>(0.0071)    | -0.0051<br>(0.0093)    | -0.0103<br>(0.0082)    |
| % White population                                                       | -0.0026<br>(0.0082)                | -0.0020<br>(0.0077)    | 0.0144<br>(0.0092)              | 0.0206***<br>(0.0072) | -0.0022<br>(0.0081)    | -0.0004<br>(0.0077)    |
| % Hispanic population                                                    | 0.0319***<br>(0.0100)              | 0.0305***<br>(0.0094)  | 0.0169<br>(0.0129)              | 0.0114<br>(0.0099)    | 0.0315***<br>(0.0100)  | 0.0288***<br>(0.0093)  |
| % Female                                                                 | -0.0157<br>(0.0118)                | -0.0149<br>(0.0108)    | -0.0052<br>(0.0122)             | -0.0064<br>(0.0090)   | -0.0152<br>(0.0113)    | -0.0153<br>(0.0105)    |
| Zip code FE                                                              | Yes                                | Yes                    | Yes                             | Yes                   | Yes                    | Yes                    |
| Year-by-month FE                                                         | Yes                                | Yes                    | Yes                             | Yes                   | Yes                    | Yes                    |
| City time trends                                                         | Yes                                | Yes                    | Yes                             | Yes                   | Yes                    | Yes                    |
| Observations                                                             | 14,163                             | 14,163                 | 14,163                          | 14,163                | 14,163                 | 14,163                 |
| Adj. R-squared                                                           | 0.9663                             | 0.9710                 | 0.9535                          | 0.9672                | 0.9720                 | 0.9751                 |

\*  $p < 0.1$ ; \*\*  $p < 0.05$ ; \*\*\*  $p < 0.01$ . Robust standard errors clustered at the zip code level are shown in parentheses. All continuous variables are winsorized at 1% and 99% levels.

**Table A5. Policy Effects on Prices Excluding Relisted Properties**

| DV: Median Nightly Rate<br>(logged)                                      | (1)<br>Nonprofessional<br>Host Properties | (2)<br>Professional Host<br>Properties | (3)<br>All Properties |
|--------------------------------------------------------------------------|-------------------------------------------|----------------------------------------|-----------------------|
| 1(Policy) <sub>it</sub>                                                  | 0.0763***<br>(0.0190)                     | 0.0339<br>(0.0246)                     | 0.0576***<br>(0.0194) |
| <i>ACS Controls: Local socioeconomic and demographic characteristics</i> |                                           |                                        |                       |
| Population (logged)                                                      | 0.1973<br>(0.3975)                        | 0.8868*<br>(0.4697)                    | 0.1672<br>(0.3893)    |
| # Households (logged)                                                    | 0.0619<br>(0.4227)                        | -1.0169**<br>(0.5094)                  | 0.0977<br>(0.3985)    |
| Median family income (logged)                                            | 0.3306**<br>(0.1343)                      | 0.2703<br>(0.2048)                     | 0.3230**<br>(0.1334)  |
| Unemployment rate                                                        | 0.0053<br>(0.0080)                        | 0.0104<br>(0.0099)                     | 0.0086<br>(0.0077)    |
| House vacancy rate                                                       | -0.0047<br>(0.0051)                       | 0.0076<br>(0.0073)                     | -0.0006<br>(0.0050)   |
| % White population                                                       | -0.0022<br>(0.0079)                       | 0.0037<br>(0.0065)                     | 0.0002<br>(0.0071)    |
| % Hispanic population                                                    | -0.0088<br>(0.0070)                       | 0.0034<br>(0.0099)                     | -0.0078<br>(0.0064)   |
| % Female                                                                 | 0.0024<br>(0.0060)                        | 0.0200**<br>(0.0080)                   | 0.0034<br>(0.0060)    |
| Zip code FE                                                              | Yes                                       | Yes                                    | Yes                   |
| Year-by-month FE                                                         | Yes                                       | Yes                                    | Yes                   |
| City time trends                                                         | Yes                                       | Yes                                    | Yes                   |
| Observations                                                             | 14,163                                    | 14,163                                 | 14,163                |
| Adj. R-squared                                                           | 0.6889                                    | 0.7294                                 | 0.7330                |

\*  $p < 0.1$ ; \*\*  $p < 0.05$ ; \*\*\*  $p < 0.01$ . Robust standard errors clustered at the zip code level are shown in parentheses. All continuous variables are winsorized at 1% and 99% levels.

**Table A6. Policy Effects on the Supply and Prices of Entrants**

| DV: (All logged)                                                         | Supply                 |                        | Price                |
|--------------------------------------------------------------------------|------------------------|------------------------|----------------------|
|                                                                          | (1)<br># Properties    | (2)<br># Hosts         | (3)<br>Nightly Rate  |
| 1(Policy) <sub>it</sub>                                                  | -0.0098<br>(0.0324)    | 0.0014<br>(0.0309)     | -0.0358<br>(0.0833)  |
| <i>ACS Controls: Local socioeconomic and demographic characteristics</i> |                        |                        |                      |
| Population (logged)                                                      | 0.1633<br>(0.4420)     | 0.0029<br>(0.4152)     | -1.7843<br>(1.2458)  |
| # Households (logged)                                                    | -0.0021<br>(0.4667)    | -0.1080<br>(0.4588)    | 0.5863<br>(1.2689)   |
| Median family income (logged)                                            | -0.7818***<br>(0.1881) | -0.7454***<br>(0.1742) | -0.4418<br>(0.4721)  |
| Unemployment rate                                                        | -0.0320***<br>(0.0081) | -0.0301***<br>(0.0077) | -0.0431*<br>(0.0220) |
| House vacancy rate                                                       | -0.0139**<br>(0.0063)  | -0.0153***<br>(0.0059) | -0.0071<br>(0.0201)  |
| % White population                                                       | -0.0055<br>(0.0072)    | -0.0069<br>(0.0068)    | -0.0171<br>(0.0184)  |
| % Hispanic population                                                    | 0.0304***<br>(0.0096)  | 0.0283***<br>(0.0089)  | 0.0588**<br>(0.0252) |
| % Female                                                                 | -0.0094<br>(0.0073)    | -0.0086<br>(0.0068)    | -0.0357*<br>(0.0205) |
| Zip code FE                                                              | Yes                    | Yes                    | Yes                  |
| Year-by-month FE                                                         | Yes                    | Yes                    | Yes                  |
| City time trends                                                         | Yes                    | Yes                    | Yes                  |
| Observations                                                             | 14,163                 | 14,163                 | 14,163               |
| Adj. R-squared                                                           | 0.8183                 | 0.8300                 | 0.4417               |

\*  $p < 0.1$ ; \*\*  $p < 0.05$ ; \*\*\*  $p < 0.01$ . Robust standard errors clustered at the zip code level are shown in parentheses. All continuous variables are winsorized at 1% and 99% levels.

**Table A7. Property-Level Analyses: Policy Effects on Prices**

|                                                                          | (1)                    | (2)                    | (3)                    | (4)                    | (5)                      |
|--------------------------------------------------------------------------|------------------------|------------------------|------------------------|------------------------|--------------------------|
| DV: Avg. nightly rate (logged)                                           | Nonpro Host Properties | Pro Host Properties    | All Properties         | Top Nonpro Properties  | Bottom Nonpro Properties |
| 1(Policy) <sub>it</sub>                                                  | -0.0091***<br>(0.0022) | -0.0410***<br>(0.0047) | -0.0215***<br>(0.0020) | -0.0154***<br>(0.0033) | -0.0017<br>(0.0030)      |
| <i>ACS Controls: Local socioeconomic and demographic characteristics</i> |                        |                        |                        |                        |                          |
| Population (logged)                                                      | -0.0407<br>(0.0684)    | 0.0538<br>(0.0884)     | -0.0088<br>(0.0543)    | -0.0843<br>(0.0965)    | 0.0497<br>(0.0952)       |
| # Households (logged)                                                    | -0.0160<br>(0.0870)    | -0.1851**<br>(0.0864)  | -0.0786<br>(0.0609)    | 0.1782<br>(0.1281)     | -0.2630**<br>(0.1132)    |
| Median family income (logged)                                            | 0.0270<br>(0.0249)     | 0.0385<br>(0.0319)     | 0.0229<br>(0.0194)     | 0.0359<br>(0.0352)     | 0.0212<br>(0.0353)       |
| Unemployment rate                                                        | 0.0014<br>(0.0012)     | -0.0048***<br>(0.0017) | -0.0006<br>(0.0010)    | 0.0014<br>(0.0017)     | 0.0019<br>(0.0018)       |
| House vacancy rate                                                       | -0.0012<br>(0.0013)    | -0.0030**<br>(0.0014)  | -0.0017*<br>(0.0009)   | 0.0007<br>(0.0019)     | -0.0036**<br>(0.0018)    |
| % White population                                                       | -0.0018*<br>(0.0009)   | 0.0007<br>(0.0012)     | -0.0010<br>(0.0007)    | -0.0013<br>(0.0013)    | -0.0018<br>(0.0013)      |
| % Hispanic population                                                    | -0.0018<br>(0.0011)    | -0.0035**<br>(0.0015)  | -0.0027***<br>(0.0009) | -0.0022<br>(0.0016)    | -0.0028*<br>(0.0016)     |
| % Female                                                                 | 0.0017<br>(0.0011)     | 0.0061***<br>(0.0014)  | 0.0033***<br>(0.0009)  | 0.0017<br>(0.0016)     | 0.0024<br>(0.0015)       |
| Zip code FE                                                              | Yes                    | Yes                    | Yes                    | Yes                    | Yes                      |
| Year-by-month FE                                                         | Yes                    | Yes                    | Yes                    | Yes                    | Yes                      |
| City time trends                                                         | Yes                    | Yes                    | Yes                    | Yes                    | Yes                      |
| Observations                                                             | 500,579                | 241,028                | 741,607                | 271,511                | 229,068                  |
| Adj. R-squared                                                           | 0.9521                 | 0.9337                 | 0.9482                 | 0.9468                 | 0.8944                   |

**Figure A1. Simulated Policy Effects on Supply**

Panel A. Simulated Policy Effects on the Supply of Nonprofessional Hosts

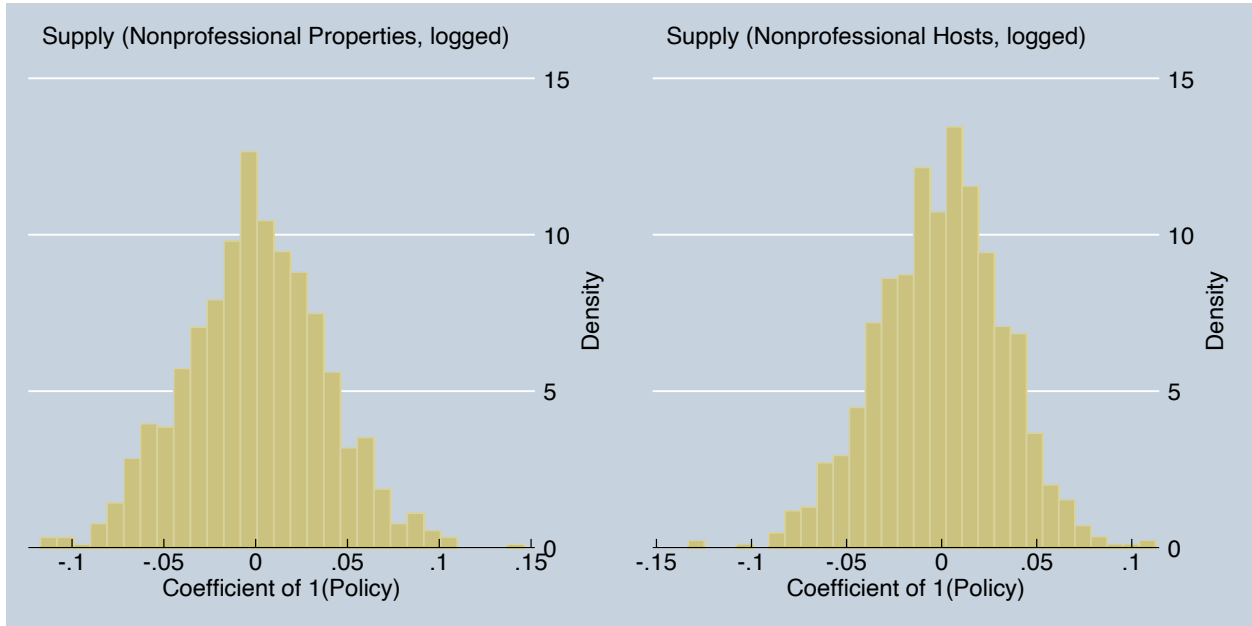

Panel B. Simulated Policy Effects on the Supply of Professional Hosts

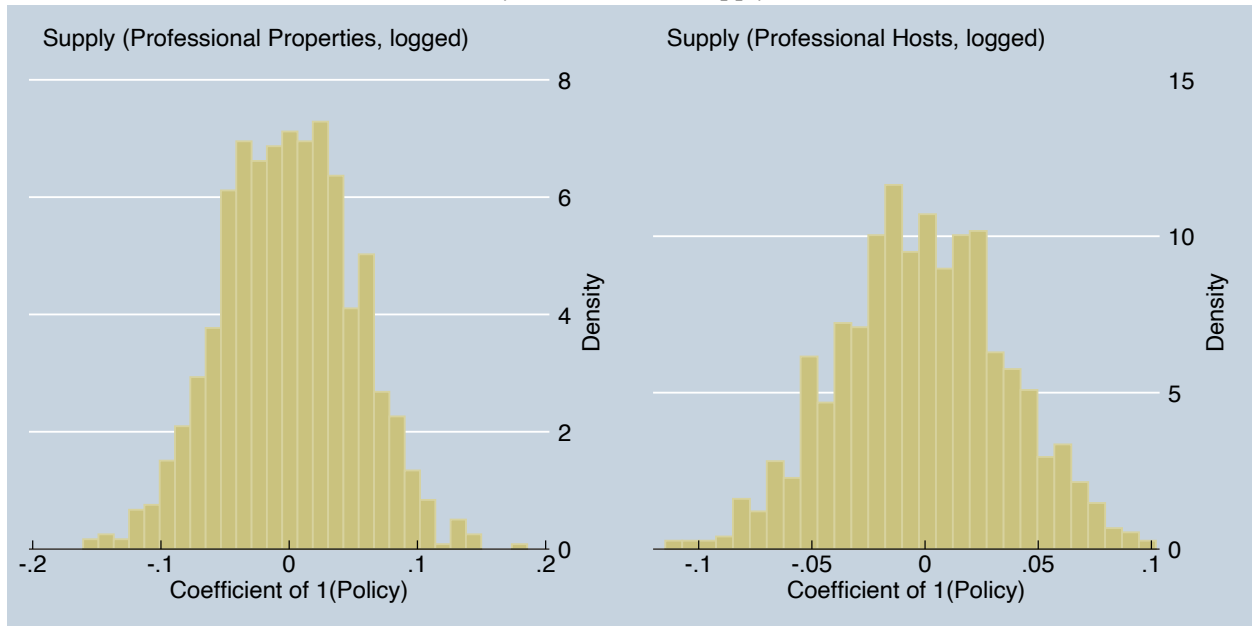

(Figure continues on the next page.)

Panel C. Simulated Policy Effects on the Total Supply

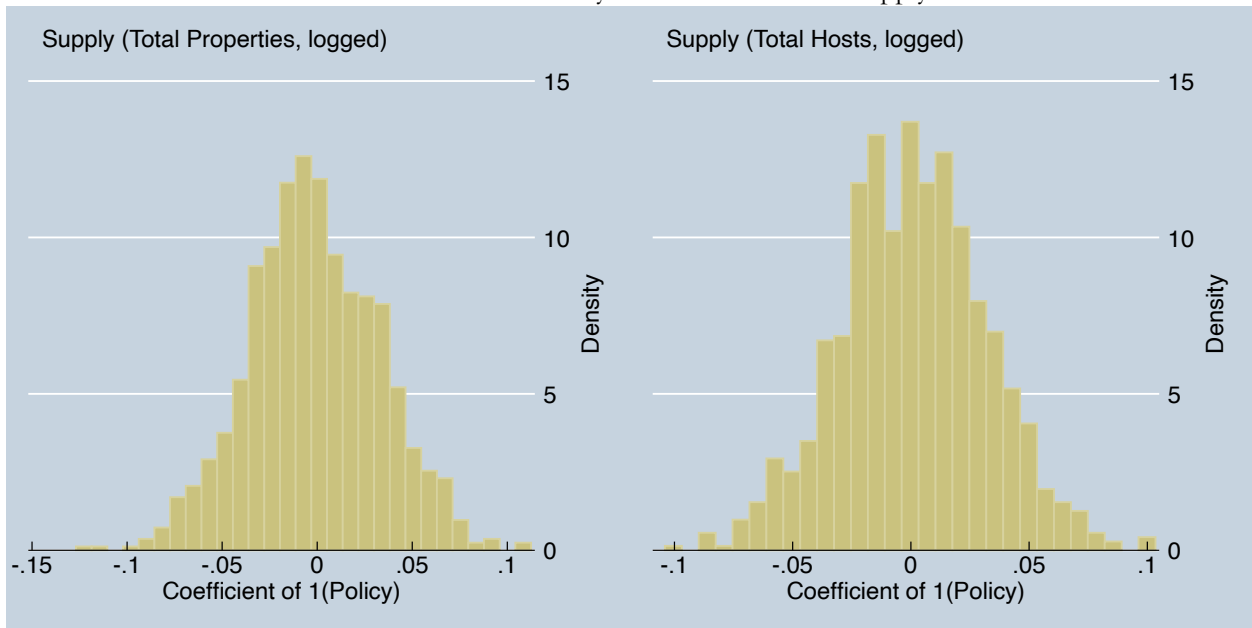

Figure A2. Simulated Policy Effect on Prices

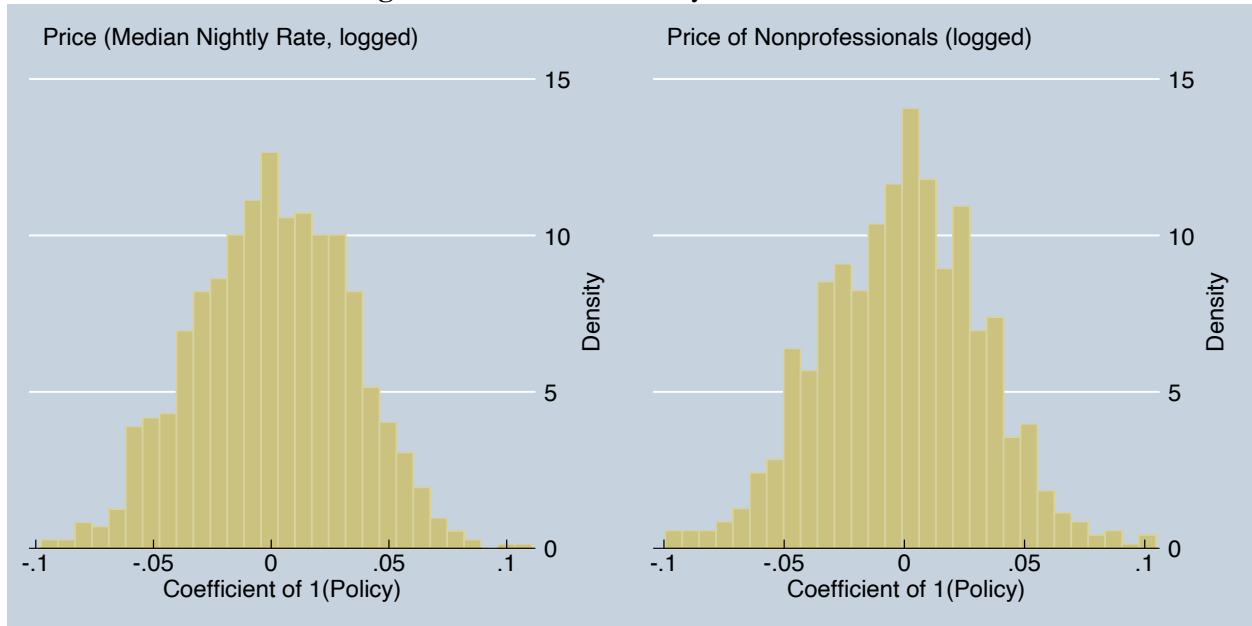

## A5. Tables and Figures of Robustness Checks in Section 5.6.2

In this section, we present a battery of analyses supporting the robustness of our main results (discussed in Section 5.6.2). We first validate the parallel trend assumption of DID using relative time models (Tables A8 - A9). We then replicate the main estimations using various samples, including the full sample without matching (Tables A10 and A11), an alternatively matched PSM sample (Tables A12 – A14), a sample that excludes San Francisco (Tables A15 and A16), and a sample excluding entire homes that share the same address (Tables A17 – A18). We also adopt an alternative definition of professional hosts (Tables A19 – A21) to show the consistency of results. We further estimate the policy impacts by including more control variables such as the total supply in the regressions for prices (Table A22) and Airbnb characteristics (Tables A23 and A24). Lastly, in addition to the market-level supply and price, we also examine the policy impacts on other market outcomes such as the median reservation days and the median revenue (Tables A25 and A26).

**Table A8. Relative Time Model for the Supply**

|                              | Supply of<br>Nonprofessional Hosts |                     | Supply of<br>Professional Hosts |                     | Total Supply         |                      |
|------------------------------|------------------------------------|---------------------|---------------------------------|---------------------|----------------------|----------------------|
|                              | (1)<br># Properties                | (2)<br># Hosts      | (3)<br># Properties             | (4)<br># Hosts      | (5)<br># Properties  | (6)<br># Hosts       |
| DVs: (All logged)            |                                    |                     |                                 |                     |                      |                      |
| D <sub>-7</sub> <sup>+</sup> | 0.0459<br>(0.0663)                 | 0.0308<br>(0.0567)  | 0.0332<br>(0.0538)              | 0.0051<br>(0.0440)  | 0.0560<br>(0.0508)   | 0.0322<br>(0.0460)   |
| D <sub>-7</sub>              | -0.0269<br>(0.0608)                | -0.0324<br>(0.0529) | 0.0049<br>(0.0526)              | -0.0330<br>(0.0426) | -0.0123<br>(0.0470)  | -0.0356<br>(0.0435)  |
| D <sub>-6</sub>              | 0.0481<br>(0.0515)                 | 0.0353<br>(0.0441)  | 0.0380<br>(0.0405)              | 0.0008<br>(0.0330)  | 0.0462<br>(0.0401)   | 0.0194<br>(0.0369)   |
| D <sub>-5</sub>              | -0.0342<br>(0.0270)                | -0.0383<br>(0.0245) | 0.0742**<br>(0.0350)            | 0.0262<br>(0.0280)  | -0.0108<br>(0.0223)  | -0.0297<br>(0.0215)  |
| D <sub>-4</sub>              | 0.0207<br>(0.0239)                 | 0.0298<br>(0.0214)  | 0.0472<br>(0.0293)              | 0.0265<br>(0.0231)  | 0.0348*<br>(0.0202)  | 0.0380**<br>(0.0187) |
| D <sub>-3</sub>              | 0.0210<br>(0.0201)                 | 0.0176<br>(0.0183)  | 0.0583**<br>(0.0234)            | 0.0307<br>(0.0188)  | 0.0350**<br>(0.0171) | 0.0241<br>(0.0161)   |
| D <sub>-2</sub>              | 0.0012<br>(0.0175)                 | 0.0038<br>(0.0181)  | 0.0277<br>(0.0180)              | 0.0207<br>(0.0154)  | 0.0084<br>(0.0158)   | 0.0061<br>(0.0169)   |
| D <sub>0</sub> (Policy)      | -0.0136<br>(0.0148)                | -0.0074<br>(0.0134) | -0.0196<br>(0.0186)             | -0.0003<br>(0.0146) | -0.0188<br>(0.0132)  | -0.0048<br>(0.0120)  |
| D <sub>1</sub>               | -0.0096<br>(0.0174)                | 0.0062<br>(0.0158)  | -0.0292<br>(0.0253)             | -0.0002<br>(0.0203) | -0.0180<br>(0.0156)  | 0.0085<br>(0.0148)   |
| D <sub>2</sub>               | -0.0063<br>(0.0214)                | 0.0124<br>(0.0198)  | -0.0503*<br>(0.0289)            | -0.0182<br>(0.0218) | -0.0198<br>(0.0190)  | 0.0112<br>(0.0181)   |

(Table continues on the next page)

|                                                                          |                        |                        |                       |                       |                        |                        |
|--------------------------------------------------------------------------|------------------------|------------------------|-----------------------|-----------------------|------------------------|------------------------|
| D <sub>3</sub>                                                           | -0.0332<br>(0.0256)    | -0.0099<br>(0.0222)    | -0.0629*<br>(0.0323)  | -0.0406*<br>(0.0240)  | -0.0421*<br>(0.0219)   | -0.0098<br>(0.0197)    |
| D <sub>4</sub>                                                           | 0.0189<br>(0.0277)     | 0.0517**<br>(0.0250)   | -0.0200<br>(0.0365)   | -0.0080<br>(0.0272)   | 0.0117<br>(0.0244)     | 0.0522**<br>(0.0230)   |
| D <sub>5</sub>                                                           | 0.0277<br>(0.0337)     | 0.0588**<br>(0.0294)   | 0.0041<br>(0.0400)    | -0.0073<br>(0.0293)   | 0.0208<br>(0.0291)     | 0.0617**<br>(0.0261)   |
| D <sub>6</sub>                                                           | 0.0704*<br>(0.0404)    | 0.1032***<br>(0.0341)  | -0.0020<br>(0.0492)   | -0.0028<br>(0.0371)   | 0.0388<br>(0.0349)     | 0.0952***<br>(0.0306)  |
| D <sub>7</sub>                                                           | 0.0844*<br>(0.0435)    | 0.1119***<br>(0.0388)  | -0.0630<br>(0.0535)   | -0.0586<br>(0.0418)   | 0.0403<br>(0.0378)     | 0.0936***<br>(0.0350)  |
| D <sub>8</sub>                                                           | 0.1044**<br>(0.0484)   | 0.1310***<br>(0.0425)  | -0.0679<br>(0.0582)   | -0.0480<br>(0.0420)   | 0.0587<br>(0.0420)     | 0.1118***<br>(0.0378)  |
| D <sub>9</sub>                                                           | 0.0828<br>(0.0546)     | 0.1173**<br>(0.0487)   | -0.0838<br>(0.0624)   | -0.0724<br>(0.0444)   | 0.0358<br>(0.0475)     | 0.0918**<br>(0.0440)   |
| D <sub>10</sub>                                                          | 0.0432<br>(0.0578)     | 0.0873*<br>(0.0513)    | -0.1456**<br>(0.0687) | -0.1221**<br>(0.0491) | -0.0204<br>(0.0498)    | 0.0525<br>(0.0456)     |
| D <sub>11</sub>                                                          | 0.0412<br>(0.0654)     | 0.0945*<br>(0.0563)    | -0.1426*<br>(0.0733)  | -0.1284**<br>(0.0534) | -0.0226<br>(0.0565)    | 0.0599<br>(0.0503)     |
| D <sub>12</sub>                                                          | 0.0473<br>(0.0682)     | 0.1085*<br>(0.0598)    | -0.1530*<br>(0.0789)  | -0.1289**<br>(0.0568) | -0.0184<br>(0.0592)    | 0.0724<br>(0.0533)     |
| D <sub>12</sub> <sup>+</sup>                                             | 0.1374*<br>(0.0765)    | 0.1927***<br>(0.0666)  | -0.0107<br>(0.0860)   | -0.0305<br>(0.0630)   | 0.0953<br>(0.0660)     | 0.1688***<br>(0.0595)  |
| <i>ACS Controls: Local socioeconomic and demographic characteristics</i> |                        |                        |                       |                       |                        |                        |
| Population (logged)                                                      | -0.0978<br>(0.5386)    | -0.2017<br>(0.4994)    | 0.8068<br>(0.6062)    | 1.5438***<br>(0.4971) | 0.0064<br>(0.5177)     | 0.0417<br>(0.4821)     |
| # Households (logged)                                                    | -0.3202<br>(0.6329)    | -0.2099<br>(0.6025)    | 0.6081<br>(0.6782)    | -0.9091*<br>(0.4858)  | 0.0501<br>(0.6109)     | -0.3584<br>(0.5681)    |
| Median family income (logged)                                            | -0.5193**<br>(0.2194)  | -0.5043**<br>(0.1982)  | -0.2135<br>(0.2805)   | -0.4727**<br>(0.2160) | -0.5173**<br>(0.2272)  | -0.5752***<br>(0.1949) |
| Unemployment rate                                                        | -0.0338***<br>(0.0100) | -0.0275***<br>(0.0085) | -0.0249*<br>(0.0138)  | -0.0241**<br>(0.0102) | -0.0322***<br>(0.0095) | -0.0293***<br>(0.0083) |
| House vacancy rate                                                       | -0.0100<br>(0.0093)    | -0.0122<br>(0.0086)    | 0.0078<br>(0.0102)    | 0.0068<br>(0.0070)    | -0.0037<br>(0.0090)    | -0.0086<br>(0.0079)    |
| % White population                                                       | -0.0026<br>(0.0080)    | -0.0018<br>(0.0076)    | 0.0157*<br>(0.0091)   | 0.0213***<br>(0.0072) | -0.0020<br>(0.0080)    | -0.0003<br>(0.0076)    |
| % Hispanic population                                                    | 0.0313***<br>(0.0099)  | 0.0301***<br>(0.0093)  | 0.0171<br>(0.0129)    | 0.0112<br>(0.0100)    | 0.0311***<br>(0.0098)  | 0.0284***<br>(0.0091)  |
| % Female                                                                 | -0.0151<br>(0.0115)    | -0.0143<br>(0.0105)    | -0.0037<br>(0.0121)   | -0.0056<br>(0.0090)   | -0.0143<br>(0.0111)    | -0.0145<br>(0.0102)    |
| Zip code FE                                                              | Yes                    | Yes                    | Yes                   | Yes                   | Yes                    | Yes                    |
| Year-by-month FE                                                         | Yes                    | Yes                    | Yes                   | Yes                   | Yes                    | Yes                    |
| City time trends                                                         | Yes                    | Yes                    | Yes                   | Yes                   | Yes                    | Yes                    |
| Observations                                                             | 14,163                 | 14,163                 | 14,163                | 14,163                | 14,163                 | 14,163                 |
| R-squared                                                                | 0.9671                 | 0.9718                 | 0.9550                | 0.9683                | 0.9729                 | 0.9760                 |

\*  $p < 0.1$ ; \*\*  $p < 0.05$ ; \*\*\*  $p < 0.01$ . Robust standard errors clustered at the zip code level are shown in parentheses. All continuous variables are winsorized at 1% and 99% levels.

**Table A9. Relative Time Model for the Price Levels**

| DV: Median Nightly Rate (logged) | (1)                                | (2)                             | (3)                   |
|----------------------------------|------------------------------------|---------------------------------|-----------------------|
|                                  | Nonprofessional<br>Host Properties | Professional Host<br>Properties | All Properties        |
| D <sub>-7</sub> <sup>+</sup>     | -0.0098<br>(0.0531)                | 0.0173<br>(0.2098)              | -0.0493<br>(0.0354)   |
| D <sub>-7</sub>                  | 0.0340<br>(0.0631)                 | 0.2075<br>(0.2264)              | -0.0044<br>(0.0425)   |
| D <sub>-6</sub>                  | -0.0150<br>(0.0298)                | 0.0858<br>(0.1476)              | -0.0312<br>(0.0218)   |
| D <sub>-5</sub>                  | 0.0040<br>(0.0263)                 | 0.0292<br>(0.1330)              | -0.0118<br>(0.0186)   |
| D <sub>-4</sub>                  | 0.0178<br>(0.0226)                 | -0.0551<br>(0.1035)             | -0.0004<br>(0.0154)   |
| D <sub>-3</sub>                  | -0.0134<br>(0.0192)                | -0.0189<br>(0.0799)             | -0.0094<br>(0.0155)   |
| D <sub>-2</sub>                  | -0.0276*<br>(0.0161)               | -0.0188<br>(0.0516)             | -0.0310**<br>(0.0154) |
| D <sub>0</sub> (Policy)          | 0.0531***<br>(0.0197)              | -0.0246<br>(0.0588)             | 0.0338***<br>(0.0129) |
| D <sub>1</sub>                   | 0.0562***<br>(0.0201)              | -0.0339<br>(0.0859)             | 0.0455***<br>(0.0154) |
| D <sub>2</sub>                   | 0.0494**<br>(0.0202)               | 0.0007<br>(0.0839)              | 0.0376*<br>(0.0194)   |
| D <sub>3</sub>                   | 0.0691**<br>(0.0267)               | -0.0011<br>(0.0924)             | 0.0682***<br>(0.0263) |
| D <sub>4</sub>                   | 0.1111***<br>(0.0282)              | 0.1252<br>(0.1079)              | 0.1106***<br>(0.0281) |
| D <sub>5</sub>                   | 0.1093***<br>(0.0311)              | 0.1273<br>(0.1244)              | 0.1110***<br>(0.0304) |
| D <sub>6</sub>                   | 0.1577***<br>(0.0401)              | 0.1811<br>(0.1629)              | 0.1578***<br>(0.0375) |
| D <sub>7</sub>                   | 0.1238***<br>(0.0411)              | 0.0852<br>(0.1697)              | 0.1366***<br>(0.0386) |
| D <sub>8</sub>                   | 0.1271***<br>(0.0466)              | 0.2145<br>(0.1910)              | 0.1420***<br>(0.0425) |
| D <sub>9</sub>                   | 0.1060**<br>(0.0499)               | 0.1500<br>(0.2014)              | 0.1393***<br>(0.0446) |
| D <sub>10</sub>                  | 0.1437***<br>(0.0523)              | 0.1439<br>(0.2190)              | 0.1656***<br>(0.0467) |
| D <sub>11</sub>                  | 0.1437**<br>(0.0572)               | 0.1960<br>(0.2368)              | 0.1790***<br>(0.0512) |
| D <sub>12</sub>                  | 0.1573**<br>(0.0643)               | 0.1970<br>(0.2539)              | 0.1925***<br>(0.0564) |
| D <sub>12</sub> <sup>+</sup>     | 0.1787**<br>(0.0730)               | 0.2631<br>(0.2766)              | 0.2356***<br>(0.0617) |

(Table continues on the next page)

---

*ACS Controls: Local socioeconomic and demographic characteristics*

|                               |                       |                       |                       |
|-------------------------------|-----------------------|-----------------------|-----------------------|
| Population (logged)           | 0.0606<br>(0.3384)    | 1.1021<br>(1.6802)    | 0.0340<br>(0.3519)    |
| # Households (logged)         | 0.1805<br>(0.3740)    | -1.1258<br>(1.4573)   | 0.2327<br>(0.3706)    |
| Median family income (logged) | 0.3269***<br>(0.1193) | -0.3758<br>(0.6288)   | 0.3378***<br>(0.1212) |
| Unemployment rate             | 0.0063<br>(0.0068)    | -0.0826**<br>(0.0394) | 0.0091<br>(0.0070)    |
| House vacancy rate            | -0.0023<br>(0.0046)   | 0.0270<br>(0.0225)    | 0.0020<br>(0.0045)    |
| % White population            | -0.0009<br>(0.0060)   | -0.0117<br>(0.0285)   | 0.0018<br>(0.0059)    |
| % Hispanic population         | -0.0052<br>(0.0059)   | -0.0018<br>(0.0299)   | -0.0058<br>(0.0059)   |
| % Female                      | 0.0009<br>(0.0052)    | 0.0210<br>(0.0290)    | 0.0042<br>(0.0055)    |
| Zip code FE                   | Yes                   | Yes                   | Yes                   |
| Year-by-month FE              | Yes                   | Yes                   | Yes                   |
| City time trends              | Yes                   | Yes                   | Yes                   |
| Observations                  | 14,163                | 14,163                | 14,163                |
| R-squared                     | 0.7445                | 0.6908                | 0.7783                |

---

\*  $p < 0.1$ ; \*\*  $p < 0.05$ ; \*\*\*  $p < 0.01$ . Robust standard errors clustered at the zip code level are shown in parentheses. All continuous variables are winsorized at 1% and 99% levels.

**Table A10. Policy Effect on Supply using the Full Sample**

|                                                                          | Supply of<br>Nonprofessional Hosts |                        | Supply of<br>Professional Hosts |                       | Total Supply          |                        |
|--------------------------------------------------------------------------|------------------------------------|------------------------|---------------------------------|-----------------------|-----------------------|------------------------|
|                                                                          | (1)<br># Properties                | (2)<br># Hosts         | (3)<br># Properties             | (4)<br># Hosts        | (5)<br># Properties   | (6)<br># Hosts         |
| DVs: (All logged)                                                        |                                    |                        |                                 |                       |                       |                        |
| $1(\text{Policy})_{it}$                                                  | 0.0465**<br>(0.0211)               | 0.0564***<br>(0.0200)  | -0.0640**<br>(0.0265)           | -0.0238<br>(0.0201)   | 0.0143<br>(0.0190)    | 0.0407**<br>(0.0182)   |
| <i>ACS Controls: Local socioeconomic and demographic characteristics</i> |                                    |                        |                                 |                       |                       |                        |
| Population (logged)                                                      | -0.0497<br>(0.4701)                | -0.0758<br>(0.4417)    | 0.4824<br>(0.6015)              | 0.7000<br>(0.5465)    | 0.0004<br>(0.4593)    | -0.0374<br>(0.4154)    |
| # Households (logged)                                                    | -0.0854<br>(0.4989)                | -0.0313<br>(0.4964)    | 1.2163**<br>(0.5952)            | 0.3339<br>(0.5781)    | 0.4568<br>(0.5086)    | 0.1073<br>(0.4487)     |
| Median family income (logged)                                            | -0.4670***<br>(0.1770)             | -0.4549***<br>(0.1611) | 0.1141<br>(0.2499)              | -0.0928<br>(0.2214)   | -0.3829**<br>(0.1874) | -0.4511***<br>(0.1636) |
| Unemployment rate                                                        | -0.0287**<br>(0.0128)              | -0.0239**<br>(0.0115)  | -0.0174<br>(0.0122)             | -0.0170*<br>(0.0091)  | -0.0261**<br>(0.0115) | -0.0240**<br>(0.0104)  |
| House vacancy rate                                                       | -0.0068<br>(0.0086)                | -0.0091<br>(0.0081)    | 0.0112<br>(0.0093)              | 0.0108<br>(0.0068)    | 0.0001<br>(0.0083)    | -0.0049<br>(0.0075)    |
| % White population                                                       | -0.0003<br>(0.0078)                | 0.0008<br>(0.0075)     | 0.0146*<br>(0.0083)             | 0.0166***<br>(0.0064) | 0.0005<br>(0.0074)    | 0.0014<br>(0.0071)     |
| % Hispanic population                                                    | 0.0228**<br>(0.0092)               | 0.0196**<br>(0.0090)   | 0.0145<br>(0.0125)              | 0.0070<br>(0.0094)    | 0.0244***<br>(0.0091) | 0.0199**<br>(0.0085)   |
| % Female                                                                 | -0.0104<br>(0.0108)                | -0.0098<br>(0.0100)    | -0.0070<br>(0.0114)             | -0.0071<br>(0.0087)   | -0.0119<br>(0.0104)   | -0.0108<br>(0.0096)    |
| Zip code FE                                                              | Yes                                | Yes                    | Yes                             | Yes                   | Yes                   | Yes                    |
| Year-by-month FE                                                         | Yes                                | Yes                    | Yes                             | Yes                   | Yes                   | Yes                    |
| City time trends                                                         | Yes                                | Yes                    | Yes                             | Yes                   | Yes                   | Yes                    |
| Observations                                                             | 15,724                             | 15,724                 | 15,724                          | 15,724                | 15,724                | 15,724                 |
| Adj. R-squared                                                           | 0.9671                             | 0.9717                 | 0.9552                          | 0.9693                | 0.9727                | 0.9760                 |

\*  $p < 0.1$ ; \*\*  $p < 0.05$ ; \*\*\*  $p < 0.01$ . Robust standard errors clustered at the zip code level are shown in parentheses. All continuous variables are winsorized at 1% and 99% levels.

**Table A11. Policy Effects on Prices using the Full Sample**

| DV: Median Nightly Rate<br>(logged)                                      | (1)<br>Nonprofessional<br>Host Properties | (2)<br>Professional Host<br>Properties | (3)<br>All Properties |
|--------------------------------------------------------------------------|-------------------------------------------|----------------------------------------|-----------------------|
| 1(Policy) <sub>it</sub>                                                  | 0.0755***<br>(0.0171)                     | 0.0018<br>(0.0813)                     | 0.0603***<br>(0.0175) |
| <i>ACS Controls: Local socioeconomic and demographic characteristics</i> |                                           |                                        |                       |
| Population (logged)                                                      | 0.3885<br>(0.3349)                        | -0.7363<br>(1.6303)                    | 0.1813<br>(0.3416)    |
| # Households (logged)                                                    | -0.2804<br>(0.3359)                       | 1.3748<br>(1.5856)                     | 0.0803<br>(0.3235)    |
| Median family income (logged)                                            | 0.2074<br>(0.1368)                        | 0.2321<br>(0.6676)                     | 0.3186***<br>(0.1147) |
| Unemployment rate                                                        | 0.0067<br>(0.0086)                        | -0.0520<br>(0.0324)                    | 0.0083<br>(0.0091)    |
| House vacancy rate                                                       | -0.0036<br>(0.0050)                       | 0.0278<br>(0.0208)                     | 0.0026<br>(0.0047)    |
| % White population                                                       | 0.0003<br>(0.0059)                        | -0.0088<br>(0.0245)                    | -0.0008<br>(0.0058)   |
| % Hispanic population                                                    | -0.0026<br>(0.0088)                       | 0.0087<br>(0.0287)                     | -0.0102*<br>(0.0059)  |
| % Female                                                                 | 0.0006<br>(0.0047)                        | 0.0154<br>(0.0265)                     | 0.0005<br>(0.0051)    |
| Zip code FE                                                              | Yes                                       | Yes                                    | Yes                   |
| Year-by-month FE                                                         | Yes                                       | Yes                                    | Yes                   |
| City time trends                                                         | Yes                                       | Yes                                    | Yes                   |
| Observations                                                             | 15,724                                    | 15,724                                 | 15,724                |
| Adj. R-squared                                                           | 0.7325                                    | 0.6878                                 | 0.7713                |

\*  $p < 0.1$ ; \*\*  $p < 0.05$ ; \*\*\*  $p < 0.01$ . Robust standard errors clustered at the zip code level are shown in parentheses. All continuous variables are winsorized at 1% and 99% levels.

**Table A12. Comparability between Affected and Unaffected Zip Codes using the Alternatively Matched Sample**

|                                                              | 154 affected<br>zip codes |        | 154 unaffected<br>zip codes |        | <i>t</i> -stat | <i>p</i> -value |
|--------------------------------------------------------------|---------------------------|--------|-----------------------------|--------|----------------|-----------------|
|                                                              | Mean                      | SD     | Mean                        | SD     |                |                 |
| # properties, total (logged)                                 | 3.621                     | 1.535  | 3.749                       | 1.397  | -0.765         | 0.445           |
| # professional host properties (logged)                      | 2.135                     | 1.466  | 2.256                       | 1.483  | -0.720         | 0.472           |
| # professional host accounts (logged)                        | 1.792                     | 1.313  | 1.908                       | 1.294  | -0.782         | 0.435           |
| # nonprofessional host properties (logged)                   | 3.394                     | 1.518  | 3.514                       | 1.341  | -0.734         | 0.463           |
| # nonprofessional host accounts (logged)                     | 3.236                     | 1.515  | 3.362                       | 1.340  | -0.771         | 0.441           |
| Med. nightly rate (logged)                                   | 4.717                     | 0.402  | 4.734                       | 0.453  | -0.349         | 0.728           |
| Med. nightly rate of professional properties (logged)        | 4.242                     | 1.659  | 4.345                       | 1.674  | -0.543         | 0.587           |
| Med. nightly rate of nonprofessional properties (logged)     | 4.614                     | 0.544  | 4.593                       | 0.545  | 0.337          | 0.736           |
| Med. reservation days (logged)                               | 1.315                     | 0.564  | 1.342                       | 0.642  | -0.398         | 0.691           |
| Med. reservation days of professional properties (logged)    | 1.440                     | 0.872  | 1.501                       | 0.889  | -0.610         | 0.542           |
| Med. reservation days of nonprofessional properties (logged) | 1.230                     | 0.565  | 1.247                       | 0.636  | -0.254         | 0.800           |
| Population (logged)                                          | 10.277                    | 0.851  | 10.318                      | 0.803  | -0.432         | 0.666           |
| # Households (logged)                                        | 9.311                     | 0.781  | 9.366                       | 0.726  | -0.643         | 0.520           |
| Median family income (logged)                                | 10.960                    | 0.444  | 10.968                      | 0.452  | -0.156         | 0.876           |
| Unemployment rate                                            | 9.440                     | 3.688  | 9.093                       | 4.363  | 0.755          | 0.451           |
| House vacancy rate                                           | 8.212                     | 4.043  | 8.227                       | 4.876  | -0.029         | 0.977           |
| % White population                                           | 36.247                    | 24.654 | 37.026                      | 25.154 | -0.275         | 0.784           |
| % Hispanic population                                        | 18.504                    | 15.431 | 17.515                      | 17.821 | 0.521          | 0.603           |
| % Female                                                     | 51.148                    | 3.141  | 51.241                      | 2.869  | -0.271         | 0.786           |

**Table A13. Policy Effects on Supply using the Alternatively Matched Sample**

|                                                                          | Supply of<br>Nonprofessional Hosts |                        | Supply of<br>Professional Hosts |                      | Total Supply           |                        |
|--------------------------------------------------------------------------|------------------------------------|------------------------|---------------------------------|----------------------|------------------------|------------------------|
|                                                                          | (1)<br># Properties                | (2)<br># Hosts         | (3)<br># Properties             | (4)<br># Hosts       | (5)<br># Properties    | (6)<br># Hosts         |
| DVs: (All logged)                                                        |                                    |                        |                                 |                      |                        |                        |
| $1(\text{Policy})_{it}$                                                  | 0.0701***<br>(0.0265)              | 0.0883***<br>(0.0253)  | -0.0707**<br>(0.0332)           | -0.0207<br>(0.0259)  | 0.0308<br>(0.0242)     | 0.0675***<br>(0.0231)  |
| <i>ACS Controls: Local socioeconomic and demographic characteristics</i> |                                    |                        |                                 |                      |                        |                        |
| Population (logged)                                                      | 0.0779<br>(0.5861)                 | -0.0227<br>(0.5431)    | 0.0333<br>(0.6724)              | 0.3683<br>(0.6580)   | 0.0499<br>(0.5742)     | -0.0355<br>(0.5242)    |
| # Households (logged)                                                    | -1.0025*<br>(0.5873)               | -1.0304*<br>(0.5625)   | 1.2344*<br>(0.7130)             | 0.3094<br>(0.8421)   | -0.4717<br>(0.5568)    | -0.7629<br>(0.5246)    |
| Median family income (logged)                                            | -0.0901<br>(0.2567)                | -0.1467<br>(0.2363)    | 0.0767<br>(0.3028)              | -0.0755<br>(0.2782)  | -0.1220<br>(0.2694)    | -0.1929<br>(0.2383)    |
| Unemployment rate                                                        | -0.0325***<br>(0.0115)             | -0.0267***<br>(0.0099) | -0.0239<br>(0.0157)             | -0.0197<br>(0.0123)  | -0.0323***<br>(0.0107) | -0.0271***<br>(0.0095) |
| House vacancy rate                                                       | -0.0132<br>(0.0101)                | -0.0152<br>(0.0096)    | 0.0048<br>(0.0107)              | 0.0107<br>(0.0082)   | -0.0082<br>(0.0096)    | -0.0104<br>(0.0090)    |
| % White population                                                       | 0.0009<br>(0.0097)                 | 0.0012<br>(0.0093)     | 0.0154<br>(0.0103)              | 0.0180**<br>(0.0081) | 0.0031<br>(0.0097)     | 0.0029<br>(0.0092)     |
| % Hispanic population                                                    | 0.0304***<br>(0.0114)              | 0.0292***<br>(0.0109)  | 0.0303**<br>(0.0147)            | 0.0216*<br>(0.0117)  | 0.0336***<br>(0.0111)  | 0.0316***<br>(0.0101)  |
| % Female                                                                 | -0.0086<br>(0.0149)                | -0.0080<br>(0.0140)    | 0.0101<br>(0.0135)              | 0.0016<br>(0.0108)   | -0.0057<br>(0.0142)    | -0.0072<br>(0.0133)    |
| Zip code FE                                                              | Yes                                | Yes                    | Yes                             | Yes                  | Yes                    | Yes                    |
| Year-by-month FE                                                         | Yes                                | Yes                    | Yes                             | Yes                  | Yes                    | Yes                    |
| City time trends                                                         | Yes                                | Yes                    | Yes                             | Yes                  | Yes                    | Yes                    |
| Observations                                                             | 10,315                             | 10,315                 | 10,315                          | 10,315               | 10,315                 | 10,315                 |
| Adj. R-squared                                                           | 0.9644                             | 0.9691                 | 0.9506                          | 0.9648               | 0.9698                 | 0.9734                 |

\*  $p < 0.1$ ; \*\*  $p < 0.05$ ; \*\*\*  $p < 0.01$ . Robust standard errors clustered at the zip code level are shown in parentheses. All continuous variables are winsorized at 1% and 99% levels.

**Table A14. Policy Effects on Prices using the Alternatively Matched Sample**

| DV: Median Nightly Rate<br>(logged)                                      | (1)<br>Nonprofessional<br>Host Properties | (2)<br>Professional Host<br>Properties | (3)<br>All Properties |
|--------------------------------------------------------------------------|-------------------------------------------|----------------------------------------|-----------------------|
| 1(Policy) <sub>it</sub>                                                  | 0.0671***<br>(0.0203)                     | -0.0354<br>(0.0982)                    | 0.0484**<br>(0.0225)  |
| <i>ACS Controls: Local socioeconomic and demographic characteristics</i> |                                           |                                        |                       |
| Population (logged)                                                      | 0.2023<br>(0.3597)                        | -0.8392<br>(2.1743)                    | 0.0191<br>(0.3725)    |
| # Households (logged)                                                    | -0.5608<br>(0.3877)                       | 0.8694<br>(2.3683)                     | -0.3292<br>(0.3211)   |
| Median family income (logged)                                            | 0.1363<br>(0.1706)                        | 0.6102<br>(0.8271)                     | 0.2849**<br>(0.1253)  |
| Unemployment rate                                                        | 0.0106<br>(0.0111)                        | -0.0829**<br>(0.0409)                  | 0.0117<br>(0.0121)    |
| House vacancy rate                                                       | -0.0082<br>(0.0052)                       | 0.0289<br>(0.0258)                     | -0.0027<br>(0.0045)   |
| % White population                                                       | -0.0021<br>(0.0077)                       | -0.0360<br>(0.0289)                    | -0.0053<br>(0.0067)   |
| % Hispanic population                                                    | -0.0026<br>(0.0119)                       | 0.0118<br>(0.0334)                     | -0.0128*<br>(0.0070)  |
| % Female                                                                 | -0.0001<br>(0.0048)                       | 0.0224<br>(0.0319)                     | 0.0005<br>(0.0054)    |
| Zip code FE                                                              | Yes                                       | Yes                                    | Yes                   |
| Year-by-month FE                                                         | Yes                                       | Yes                                    | Yes                   |
| City time trends                                                         | Yes                                       | Yes                                    | Yes                   |
| Observations                                                             | 10,315                                    | 10,315                                 | 10,315                |
| Adj. R-squared                                                           | 0.7185                                    | 0.6914                                 | 0.7454                |

\*  $p < 0.1$ ; \*\*  $p < 0.05$ ; \*\*\*  $p < 0.01$ . Robust standard errors clustered at the zip code level are shown in parentheses. All continuous variables are winsorized at 1% and 99% levels.

**Table A15. Policy Effects on Supply Using the Sample without San Francisco**

|                                                                          | Supply of<br>Nonprofessional Hosts |                        | Supply of<br>Professional Hosts |                       | Total Supply           |                        |
|--------------------------------------------------------------------------|------------------------------------|------------------------|---------------------------------|-----------------------|------------------------|------------------------|
|                                                                          | (1)<br># Properties                | (2)<br># Hosts         | (3)<br># Properties             | (4)<br># Hosts        | (5)<br># Properties    | (6)<br># Hosts         |
| D.V.s: (All logged)                                                      |                                    |                        |                                 |                       |                        |                        |
| $1(\text{Policy})_{it}$                                                  | 0.0459*<br>(0.0243)                | 0.0607***<br>(0.0232)  | -0.0863***<br>(0.0299)          | -0.0454**<br>(0.0223) | 0.0088<br>(0.0221)     | 0.0392*<br>(0.0212)    |
| <i>ACS Controls: Local socioeconomic and demographic characteristics</i> |                                    |                        |                                 |                       |                        |                        |
| Population (logged)                                                      | -0.0983<br>(0.6140)                | -0.0379<br>(0.5612)    | 0.1647<br>(0.7426)              | 1.0258<br>(0.6274)    | -0.2026<br>(0.6370)    | 0.0777<br>(0.5697)     |
| # Households (logged)                                                    | -0.5034<br>(0.8371)                | -0.5635<br>(0.8197)    | 0.7024<br>(0.8761)              | -0.5034<br>(0.6317)   | 0.0282<br>(1.0017)     | -0.5605<br>(0.8387)    |
| Median family income (logged)                                            | -0.5553**<br>(0.2817)              | -0.4498*<br>(0.2491)   | -0.0426<br>(0.3459)             | -0.2408<br>(0.2688)   | -0.5261*<br>(0.2846)   | -0.5433**<br>(0.2459)  |
| Unemployment rate                                                        | -0.0345***<br>(0.0124)             | -0.0309***<br>(0.0102) | -0.0274*<br>(0.0139)            | -0.0226**<br>(0.0107) | -0.0333***<br>(0.0115) | -0.0306***<br>(0.0097) |
| House vacancy rate                                                       | -0.0146<br>(0.0104)                | -0.0157<br>(0.0097)    | 0.0047<br>(0.0110)              | 0.0062<br>(0.0078)    | -0.0068<br>(0.0103)    | -0.0111<br>(0.0091)    |
| % White population                                                       | -0.0049<br>(0.0090)                | -0.0021<br>(0.0083)    | 0.0058<br>(0.0098)              | 0.0165**<br>(0.0080)  | -0.0060<br>(0.0089)    | -0.0012<br>(0.0083)    |
| % Hispanic population                                                    | 0.0249**<br>(0.0114)               | 0.0247**<br>(0.0107)   | -0.0004<br>(0.0133)             | 0.0023<br>(0.0104)    | 0.0244**<br>(0.0110)   | 0.0245**<br>(0.0101)   |
| % Female                                                                 | -0.0174<br>(0.0134)                | -0.0157<br>(0.0123)    | -0.0013<br>(0.0134)             | -0.0035<br>(0.0101)   | -0.0167<br>(0.0129)    | -0.0156<br>(0.0119)    |
| Zip code FE                                                              | Yes                                | Yes                    | Yes                             | Yes                   | Yes                    | Yes                    |
| Year-by-month FE                                                         | Yes                                | Yes                    | Yes                             | Yes                   | Yes                    | Yes                    |
| City time trends                                                         | Yes                                | Yes                    | Yes                             | Yes                   | Yes                    | Yes                    |
| Observations                                                             | 12,165                             | 12,165                 | 12,165                          | 12,165                | 12,165                 | 12,165                 |
| Adj. R-squared                                                           | 0.9666                             | 0.9712                 | 0.9543                          | 0.9677                | 0.9719                 | 0.9752                 |

\*  $p < 0.1$ ; \*\*  $p < 0.05$ ; \*\*\*  $p < 0.01$ . Robust standard errors clustered at the zip code level are shown in parentheses. All continuous variables are winsorized at 1% and 99% levels.

**Table A16. Policy Effects on Prices Using the Sample without San Francisco**

| D.V.: Median Nightly Rate<br>(logged)                                    | (1)<br>Nonprofessional<br>Host Properties | (2)<br>Professional Host<br>Properties | (3)<br>All Properties |
|--------------------------------------------------------------------------|-------------------------------------------|----------------------------------------|-----------------------|
| 1(Policy) <sub>it</sub>                                                  | 0.0852***<br>(0.0206)                     | -0.0538<br>(0.0942)                    | 0.0703***<br>(0.0210) |
| <i>ACS Controls: Local socioeconomic and demographic characteristics</i> |                                           |                                        |                       |
| Population (logged)                                                      | 0.4547<br>(0.4285)                        | 1.5470<br>(1.7874)                     | 0.2697<br>(0.4231)    |
| # Households (logged)                                                    | -0.6293<br>(0.4118)                       | -1.9200<br>(1.4678)                    | -0.1272<br>(0.3970)   |
| Median family income (logged)                                            | 0.3194<br>(0.2081)                        | -0.5057<br>(0.8322)                    | 0.5089***<br>(0.1570) |
| Unemployment rate                                                        | -0.0028<br>(0.0125)                       | -0.0979**<br>(0.0380)                  | -0.0024<br>(0.0129)   |
| House vacancy rate                                                       | -0.0053<br>(0.0061)                       | 0.0080<br>(0.0243)                     | 0.0027<br>(0.0052)    |
| % White population                                                       | 0.0031<br>(0.0081)                        | -0.0214<br>(0.0290)                    | -0.0000<br>(0.0072)   |
| % Hispanic population                                                    | 0.0020<br>(0.0112)                        | -0.0053<br>(0.0322)                    | -0.0102<br>(0.0072)   |
| % Female                                                                 | 0.0009<br>(0.0061)                        | 0.0157<br>(0.0325)                     | 0.0065<br>(0.0061)    |
| Zip code FE                                                              | Yes                                       | Yes                                    | Yes                   |
| Year-by-month FE                                                         | Yes                                       | Yes                                    | Yes                   |
| City time trends                                                         | Yes                                       | Yes                                    | Yes                   |
| Observations                                                             | 12,165                                    | 12,165                                 | 12,165                |
| Adj. R-squared                                                           | 0.6720                                    | 0.6857                                 | 0.7279                |

\*  $p < 0.1$ ; \*\*  $p < 0.05$ ; \*\*\*  $p < 0.01$ . Robust standard errors clustered at the zip code level are shown in parentheses. All continuous variables are winsorized at 1% and 99% levels.

**Table A17. Policy Effects on the Supply Excluding Entire Home Listings Sharing the Same Address**

|                                                                          | Supply of<br>Nonprofessional Hosts |                        | Supply of<br>Professional Hosts |                       | Total Supply           |                        |
|--------------------------------------------------------------------------|------------------------------------|------------------------|---------------------------------|-----------------------|------------------------|------------------------|
|                                                                          | (1)<br># Properties                | (2)<br># Hosts         | (3)<br># Properties             | (4)<br># Hosts        | (5)<br># Properties    | (6)<br># Hosts         |
| DVs: (All logged)                                                        |                                    |                        |                                 |                       |                        |                        |
| $1(\text{Policy})_{it}$                                                  | 0.0440**<br>(0.0222)               | 0.0558***<br>(0.0213)  | -0.0646**<br>(0.0279)           | -0.0221<br>(0.0209)   | 0.0111<br>(0.0200)     | 0.0397**<br>(0.0194)   |
| <i>ACS Controls: Local socioeconomic and demographic characteristics</i> |                                    |                        |                                 |                       |                        |                        |
| Population (logged)                                                      | -0.0914<br>(0.5367)                | -0.1813<br>(0.4978)    | 0.8019<br>(0.6052)              | 1.5181***<br>(0.4944) | 0.0074<br>(0.5148)     | 0.0556<br>(0.4802)     |
| # Households (logged)                                                    | -0.3514<br>(0.6311)                | -0.2555<br>(0.6007)    | 0.6354<br>(0.6748)              | -0.8329*<br>(0.4863)  | 0.0216<br>(0.6069)     | -0.3869<br>(0.5668)    |
| Median family income (logged)                                            | -0.5156**<br>(0.2203)              | -0.5002**<br>(0.1990)  | -0.1841<br>(0.2769)             | -0.4543**<br>(0.2150) | -0.5020**<br>(0.2259)  | -0.5670***<br>(0.1952) |
| Unemployment rate                                                        | -0.0346***<br>(0.0100)             | -0.0286***<br>(0.0085) | -0.0246*<br>(0.0138)            | -0.0235**<br>(0.0102) | -0.0328***<br>(0.0095) | -0.0302***<br>(0.0083) |
| House vacancy rate                                                       | -0.0111<br>(0.0093)                | -0.0133<br>(0.0086)    | 0.0091<br>(0.0102)              | 0.0080<br>(0.0070)    | -0.0043<br>(0.0090)    | -0.0093<br>(0.0079)    |
| % White                                                                  | -0.0031<br>(0.0081)                | -0.0023<br>(0.0076)    | 0.0155*<br>(0.0091)             | 0.0211***<br>(0.0072) | -0.0025<br>(0.0080)    | -0.0007<br>(0.0076)    |
| % Hispanic                                                               | 0.0311***<br>(0.0099)              | 0.0296***<br>(0.0093)  | 0.0169<br>(0.0128)              | 0.0113<br>(0.0100)    | 0.0308***<br>(0.0098)  | 0.0279***<br>(0.0091)  |
| % Female                                                                 | -0.0148<br>(0.0116)                | -0.0139<br>(0.0106)    | -0.0033<br>(0.0121)             | -0.0048<br>(0.0090)   | -0.0141<br>(0.0111)    | -0.0141<br>(0.0102)    |
| Zip code FE                                                              | Yes                                | Yes                    | Yes                             | Yes                   | Yes                    | Yes                    |
| Year-by-month FE                                                         | Yes                                | Yes                    | Yes                             | Yes                   | Yes                    | Yes                    |
| City time trends                                                         | Yes                                | Yes                    | Yes                             | Yes                   | Yes                    | Yes                    |
| Observations                                                             | 14,163                             | 14,163                 | 14,163                          | 14,163                | 14,163                 | 14,163                 |
| Adj. R-squared                                                           | 0.9668                             | 0.9714                 | 0.9546                          | 0.9681                | 0.9726                 | 0.9757                 |

\*  $p < 0.1$ ; \*\*  $p < 0.05$ ; \*\*\*  $p < 0.01$ . Robust standard errors clustered at the zip code level are shown in parentheses. All continuous variables are winsorized at 1% and 99% levels.

**Table A18. Policy Effects on the Prices Excluding Entire Home Listings Sharing the Same Address**

| DVs: Median Nightly Rate<br>(logged)                                     | (1)<br>Nonprofessional<br>Host Properties | (2)<br>Professional Host<br>Properties | (3)<br>All Properties |
|--------------------------------------------------------------------------|-------------------------------------------|----------------------------------------|-----------------------|
| 1(Policy) <sub>it</sub>                                                  | 0.0782***<br>(0.0192)                     | 0.0356<br>(0.0243)                     | 0.0600***<br>(0.0194) |
| <i>ACS Controls: Local socioeconomic and demographic characteristics</i> |                                           |                                        |                       |
| Population (logged)                                                      | 0.2190<br>(0.3977)                        | 0.7491<br>(0.4680)                     | 0.1716<br>(0.3906)    |
| # Households (logged)                                                    | 0.0760<br>(0.4217)                        | -0.9025*<br>(0.5069)                   | 0.1090<br>(0.3983)    |
| Median family income (logged)                                            | 0.3412**<br>(0.1348)                      | 0.2786<br>(0.2035)                     | 0.3338**<br>(0.1341)  |
| Unemployment rate                                                        | 0.0052<br>(0.0080)                        | 0.0114<br>(0.0098)                     | 0.0084<br>(0.0077)    |
| House vacancy rate                                                       | -0.0044<br>(0.0051)                       | 0.0080<br>(0.0072)                     | -0.0004<br>(0.0050)   |
| % White population                                                       | -0.0023<br>(0.0079)                       | 0.0046<br>(0.0065)                     | 0.0002<br>(0.0071)    |
| % Hispanic population                                                    | -0.0093<br>(0.0070)                       | 0.0041<br>(0.0100)                     | -0.0081<br>(0.0064)   |
| % Female                                                                 | 0.0025<br>(0.0060)                        | 0.0199**<br>(0.0080)                   | 0.0039<br>(0.0060)    |
| Zip code FE                                                              | Yes                                       | Yes                                    | Yes                   |
| Year-by-month FE                                                         | Yes                                       | Yes                                    | Yes                   |
| City time trends                                                         | Yes                                       | Yes                                    | Yes                   |
| Observations                                                             | 14,163                                    | 14,163                                 | 14,163                |
| Adj. R-squared                                                           | 0.6893                                    | 0.7305                                 | 0.7334                |

\*  $p < 0.1$ ; \*\*  $p < 0.05$ ; \*\*\*  $p < 0.01$ . Robust standard errors clustered at the zip code level are shown in parentheses. All continuous variables are winsorized at 1% and 99% levels.

**Table A19. Comparing Professional and Nonprofessional Properties using an Alternative Definition of Professional Hosts**

|                                  | Properties by Professional Hosts |           |      |         | Properties by Nonprofessional Hosts |           |      |         | <i>t</i> -stat | <i>p</i> -value |
|----------------------------------|----------------------------------|-----------|------|---------|-------------------------------------|-----------|------|---------|----------------|-----------------|
|                                  | Mean                             | SD        | Min. | Max.    | Mean                                | SD        | Min. | Max.    |                |                 |
| <i>Property Performance:</i>     |                                  |           |      |         |                                     |           |      |         |                |                 |
| Nightly rate                     | 194.771                          | 335.788   | 0    | 11,000  | 232.515                             | 414.173   | 0    | 12,000  | -19.671        | < 2.220e-16     |
| # Reservation days               | 7.937                            | 8.691     | 0    | 31      | 5.949                               | 7.743     | 0    | 31      | 46.175         | < 2.220e-16     |
| Revenue                          | 1,265.869                        | 2,299.095 | 0    | 180,000 | 967.697                             | 2,172.233 | 0    | 250,000 | 25.606         | < 2.220e-16     |
| <i>Property Characteristics:</i> |                                  |           |      |         |                                     |           |      |         |                |                 |
| # Bedrooms                       | 1.317                            | 0.862     | 0    | 10      | 1.209                               | 0.797     | 0    | 14      | 25.057         | < 2.220e-16     |
| # Bathrooms                      | 1.289                            | 0.683     | 0    | 11      | 1.201                               | 0.523     | 0    | 15.5    | 27.313         | < 2.220e-16     |
| Max. guests                      | 3.327                            | 2.406     | 1    | 18      | 2.927                               | 1.812     | 1    | 16      | 35.319         | < 2.220e-16     |
| Security deposits                | 383.144                          | 522.950   | 25   | 10,000  | 411.474                             | 522.685   | 25   | 5,100   | -7.083         | 1.423           |
| Cleaning fee                     | 68.367                           | 62.684    | 5    | 1,800   | 63.949                              | 49.335    | 5    | 1,318   | 12.309         | < 2.220e-16     |
| Extra people fee                 | 26.714                           | 23.240    | 1    | 300     | 30.540                              | 29.000    | 1    | 300     | -16.569        | < 2.220e-16     |
| Minimum stay                     | 3.424                            | 10.142    | 0    | 540     | 3.156                               | 11.468    | 0    | 1,250   | 4.827          | 1.389e-06       |
| # Photos                         | 14.404                           | 12.561    | 0    | 255     | 10.054                              | 9.165     | 0    | 156     | 71.931         | < 2.220e-16     |
| Business ready status            | 0.135                            | 0.341     | 0    | 1       | 0.093                               | 0.290     | 0    | 1       | 25.099         | < 2.220e-16     |
| Instant book enabled             | 0.166                            | 0.372     | 0    | 1       | 0.082                               | 0.274     | 0    | 1       | 48.225         | < 2.220e-16     |
| <i>Service Characteristics:</i>  |                                  |           |      |         |                                     |           |      |         |                |                 |
| Super host status                | 0.155                            | 0.362     | 0    | 1       | 0.072                               | 0.258     | 0    | 1       | 50.005         | < 2.220e-16     |
| Response rate %                  | 90.463                           | 20.323    | 0    | 100     | 87.284                              | 24.792    | 0    | 100     | 22.193         | < 2.220e-16     |
| Num. obs.                        |                                  | 63,624    |      |         |                                     | 89,840    |      |         |                |                 |

*Note.* Each observation is the median value of the corresponding variable across the period before the policy announcement (October 2014 - April 2016). For example, the variable “Nightly rate” is the median nightly rate (price) of a property across all months between October 2014 and April 2016. The sample we use in this table contains hosts who were active before the announcement of the policy. The purpose is to eliminate any contamination from the policy.

**Table A20. Policy Effects on the Supply using an Alternative Definition of Professional Hosts**

|                                                                          | Supply of<br>Nonprofessional Hosts |                        | Supply of<br>Professional Hosts |                        | Total Supply           |                        |
|--------------------------------------------------------------------------|------------------------------------|------------------------|---------------------------------|------------------------|------------------------|------------------------|
|                                                                          | (1)<br># Properties                | (2)<br># Hosts         | (3)<br># Properties             | (4)<br># Hosts         | (5)<br># Properties    | (6)<br># Hosts         |
| DVs: (All logged)                                                        |                                    |                        |                                 |                        |                        |                        |
| $1(\text{Policy})_{it}$                                                  | 0.0695***<br>(0.0242)              | 0.0695***<br>(0.0242)  | -0.0468*<br>(0.0240)            | -0.0188<br>(0.0190)    | 0.0131<br>(0.0200)     | 0.0410**<br>(0.0194)   |
| <i>ACS Controls: Local socioeconomic and demographic characteristics</i> |                                    |                        |                                 |                        |                        |                        |
| Population (logged)                                                      | -0.1373<br>(0.5772)                | -0.1373<br>(0.5772)    | 0.1691<br>(0.5568)              | 0.5307<br>(0.4323)     | -0.0200<br>(0.5177)    | 0.0439<br>(0.4811)     |
| # Households (logged)                                                    | -0.2692<br>(0.6455)                | -0.2692<br>(0.6455)    | 0.3842<br>(0.6388)              | -0.5029<br>(0.4986)    | 0.0500<br>(0.6104)     | -0.3863<br>(0.5680)    |
| Median family income (logged)                                            | -0.5032**<br>(0.2147)              | -0.5032**<br>(0.2147)  | -0.3661<br>(0.2692)             | -0.4521**<br>(0.2012)  | -0.5245**<br>(0.2275)  | -0.5806***<br>(0.1959) |
| Unemployment rate                                                        | -0.0291***<br>(0.0099)             | -0.0291***<br>(0.0099) | -0.0348***<br>(0.0121)          | -0.0310***<br>(0.0094) | -0.0326***<br>(0.0095) | -0.0300***<br>(0.0083) |
| House vacancy rate                                                       | -0.0109<br>(0.0089)                | -0.0109<br>(0.0089)    | 0.0051<br>(0.0094)              | -0.0023<br>(0.0074)    | -0.0042<br>(0.0090)    | -0.0094<br>(0.0079)    |
| % White population                                                       | 0.0020<br>(0.0087)                 | 0.0020<br>(0.0087)     | 0.0006<br>(0.0091)              | 0.0034<br>(0.0074)     | -0.0021<br>(0.0080)    | -0.0009<br>(0.0076)    |
| % Hispanic population                                                    | 0.0349***<br>(0.0106)              | 0.0349***<br>(0.0106)  | 0.0236**<br>(0.0108)            | 0.0137<br>(0.0090)     | 0.0312***<br>(0.0098)  | 0.0285***<br>(0.0091)  |
| % Female                                                                 | -0.0172<br>(0.0110)                | -0.0172<br>(0.0110)    | -0.0071<br>(0.0116)             | -0.0043<br>(0.0095)    | -0.0143<br>(0.0111)    | -0.0142<br>(0.0102)    |
| Zip code FE                                                              | Yes                                | Yes                    | Yes                             | Yes                    | Yes                    | Yes                    |
| Year-by-month FE                                                         | Yes                                | Yes                    | Yes                             | Yes                    | Yes                    | Yes                    |
| City time trends                                                         | Yes                                | Yes                    | Yes                             | Yes                    | Yes                    | Yes                    |
| Observations                                                             | 14,163                             | 14,163                 | 14,163                          | 14,163                 | 14,163                 | 14,163                 |
| Adj. R-squared                                                           | 0.9635                             | 0.9635                 | 0.9621                          | 0.9740                 | 0.9723                 | 0.9755                 |

\*  $p < 0.1$ ; \*\*  $p < 0.05$ ; \*\*\*  $p < 0.01$ . Robust standard errors clustered at the zip code level are shown in parentheses. All continuous variables are winsorized at 1% and 99% levels.

**Table A21. Policy Effects on the Prices using the Alternative Definition of Professional Hosts**

| DV: Median Nightly Rate<br>(logged)                                      | (1)<br>Nonprofessional<br>Host Properties | (2)<br>Professional Host<br>Properties | (3)<br>All Properties |
|--------------------------------------------------------------------------|-------------------------------------------|----------------------------------------|-----------------------|
| 1(Policy) <sub>it</sub>                                                  | 0.0780**<br>(0.0358)                      | -0.0330<br>(0.0533)                    | 0.0592***<br>(0.0181) |
| <i>ACS Controls: Local socioeconomic and demographic characteristics</i> |                                           |                                        |                       |
| Population (logged)                                                      | -0.0944<br>(0.7492)                       | -0.0764<br>(1.1012)                    | 0.0768<br>(0.3537)    |
| # Households (logged)                                                    | -0.4426<br>(0.6956)                       | -0.2590<br>(0.8713)                    | 0.1827<br>(0.3698)    |
| Median family income (logged)                                            | -0.1153<br>(0.2800)                       | -0.4794<br>(0.4674)                    | 0.3363***<br>(0.1219) |
| Unemployment rate                                                        | -0.0238<br>(0.0180)                       | -0.0066<br>(0.0222)                    | 0.0084<br>(0.0071)    |
| House vacancy rate                                                       | 0.0048<br>(0.0154)                        | -0.0001<br>(0.0135)                    | 0.0013<br>(0.0044)    |
| % White population                                                       | -0.0338*<br>(0.0173)                      | -0.0100<br>(0.0152)                    | 0.0019<br>(0.0059)    |
| % Hispanic population                                                    | -0.0073<br>(0.0139)                       | 0.0188<br>(0.0168)                     | -0.0061<br>(0.0058)   |
| % Female                                                                 | -0.0177<br>(0.0118)                       | 0.0122<br>(0.0267)                     | 0.0042<br>(0.0055)    |
| Zip code FE                                                              | Yes                                       | Yes                                    | Yes                   |
| Year-by-month FE                                                         | Yes                                       | Yes                                    | Yes                   |
| City time trends                                                         | Yes                                       | Yes                                    | Yes                   |
| Observations                                                             | 14,163                                    | 14,163                                 | 14,163                |
| Adj. R-squared                                                           | 0.4419                                    | 0.6707                                 | 0.7686                |

\*  $p < 0.1$ ; \*\*  $p < 0.05$ ; \*\*\*  $p < 0.01$ . Robust standard errors clustered at the zip code level are shown in parentheses. All continuous variables are winsorized at 1% and 99% levels.

**Table A22. Policy Effects on the Prices Controlling the Total Supply**

| DV: Median Nightly Rate<br>(logged)                                      | (1)<br>Nonprofessional<br>Host Properties | (2)<br>Professional Host<br>Properties | (3)<br>All Properties |
|--------------------------------------------------------------------------|-------------------------------------------|----------------------------------------|-----------------------|
| 1(Policy) <sub>it</sub>                                                  | 0.0736***<br>(0.0177)                     | -0.0197<br>(0.0850)                    | 0.0595***<br>(0.0181) |
| Total supply (logged)                                                    | 0.0060<br>(0.0322)                        | 0.8204***<br>(0.1265)                  | -0.0223<br>(0.0321)   |
| <i>ACS Controls: Local socioeconomic and demographic characteristics</i> |                                           |                                        |                       |
| Population (logged)                                                      | 0.0889<br>(0.3412)                        | 1.2085<br>(1.5997)                     | 0.0763<br>(0.3530)    |
| # Households (logged)                                                    | 0.1493<br>(0.3745)                        | -1.2665<br>(1.3288)                    | 0.1839<br>(0.3708)    |
| Median family income (logged)                                            | 0.3273***<br>(0.1231)                     | 0.0514<br>(0.5971)                     | 0.3246***<br>(0.1242) |
| Unemployment rate                                                        | 0.0061<br>(0.0068)                        | -0.0567<br>(0.0372)                    | 0.0077<br>(0.0070)    |
| House vacancy rate                                                       | -0.0027<br>(0.0046)                       | 0.0295<br>(0.0208)                     | 0.0012<br>(0.0045)    |
| % White population                                                       | -0.0008<br>(0.0059)                       | -0.0092<br>(0.0274)                    | 0.0019<br>(0.0058)    |
| % Hispanic population                                                    | -0.0056<br>(0.0060)                       | -0.0276<br>(0.0296)                    | -0.0054<br>(0.0060)   |
| % Female                                                                 | 0.0010<br>(0.0052)                        | 0.0325<br>(0.0269)                     | 0.0039<br>(0.0055)    |
| Zip code FE                                                              | Yes                                       | Yes                                    | Yes                   |
| Year-by-month FE                                                         | Yes                                       | Yes                                    | Yes                   |
| City time trends                                                         | Yes                                       | Yes                                    | Yes                   |
| Observations                                                             | 14,163                                    | 14,163                                 | 14,163                |
| Adj. R-squared                                                           | 0.7339                                    | 0.6925                                 | 0.7688                |

\*  $p < 0.1$ ; \*\*  $p < 0.05$ ; \*\*\*  $p < 0.01$ . Robust standard errors clustered at the zip code level are shown in parentheses. All continuous variables are winsorized at 1% and 99% levels.

**Table A23. Policy Effects on the Supply Controlling Airbnb Characteristics**

| DV: (All logged)                                                         | Nonprofessional Supply |                        | Professional Supply   |                       | Total Supply           |                        |
|--------------------------------------------------------------------------|------------------------|------------------------|-----------------------|-----------------------|------------------------|------------------------|
|                                                                          | (1)<br># Properties    | (2)<br># Hosts         | (3)<br># Properties   | (4)<br># Hosts        | (5)<br># Properties    | (6)<br># Hosts         |
| 1(Policy) <sub>it</sub>                                                  | 0.0280<br>(0.0207)     | 0.0372*<br>(0.0194)    | -0.0683**<br>(0.0267) | -0.0267<br>(0.0200)   | -0.0015<br>(0.0182)    | 0.0228<br>(0.0172)     |
| # Bedrooms                                                               | 0.0294<br>(0.0766)     | 0.1143<br>(0.0726)     | -0.0759<br>(0.0957)   | -0.0118<br>(0.0652)   | -0.0172<br>(0.0803)    | 0.0932<br>(0.0728)     |
| # Bathrooms                                                              | 0.1900**<br>(0.0818)   | 0.0388<br>(0.0672)     | -0.1166<br>(0.0964)   | -0.0322<br>(0.0642)   | 0.1262<br>(0.0789)     | 0.0237<br>(0.0626)     |
| Max. guests                                                              | -0.0358<br>(0.0284)    | -0.0155<br>(0.0263)    | 0.1146***<br>(0.0363) | 0.0689***<br>(0.0238) | 0.0070<br>(0.0272)     | 0.0041<br>(0.0256)     |
| Security deposits                                                        | 0.0005***<br>(0.0001)  | 0.0004***<br>(0.0001)  | 0.0000<br>(0.0001)    | 0.0000<br>(0.0001)    | 0.0004***<br>(0.0001)  | 0.0004***<br>(0.0001)  |
| Cleaning fee                                                             | -0.0024***<br>(0.0006) | -0.0011*<br>(0.0006)   | 0.0016<br>(0.0010)    | 0.0017**<br>(0.0007)  | -0.0019***<br>(0.0007) | -0.0007<br>(0.0006)    |
| Extra people fee                                                         | 0.0085***<br>(0.0014)  | 0.0087***<br>(0.0013)  | -0.0005<br>(0.0020)   | -0.0001<br>(0.0012)   | 0.0080***<br>(0.0014)  | 0.0085***<br>(0.0012)  |
| Minimum stay                                                             | -0.0095*<br>(0.0050)   | -0.0095**<br>(0.0043)  | 0.0100<br>(0.0070)    | 0.0038<br>(0.0049)    | -0.0027<br>(0.0050)    | -0.0059<br>(0.0042)    |
| # Photos                                                                 | -0.0229***<br>(0.0036) | -0.0227***<br>(0.0034) | -0.0018<br>(0.0045)   | -0.0050<br>(0.0032)   | -0.0185***<br>(0.0033) | -0.0203***<br>(0.0031) |
| Business ready status                                                    | -0.3106***<br>(0.1019) | -0.1644*<br>(0.0872)   | 0.0735<br>(0.1551)    | 0.1917*<br>(0.1005)   | -0.2209**<br>(0.0916)  | -0.0700<br>(0.0784)    |
| Instant book enabled                                                     | 0.2108*<br>(0.1110)    | 0.1441<br>(0.0978)     | 0.1491<br>(0.1245)    | 0.0559<br>(0.0850)    | 0.2625**<br>(0.1061)   | 0.1691*<br>(0.0949)    |
| Super host status                                                        | -0.2115**<br>(0.1050)  | -0.1530*<br>(0.0873)   | -0.1445<br>(0.1565)   | -0.0811<br>(0.1014)   | -0.2282**<br>(0.1054)  | -0.1797**<br>(0.0850)  |
| Response rate %                                                          | 0.0000<br>(0.0015)     | -0.0018<br>(0.0013)    | 0.0048***<br>(0.0017) | 0.0032***<br>(0.0012) | 0.0017<br>(0.0016)     | -0.0005<br>(0.0013)    |
| <i>ACS Controls: Local socioeconomic and demographic characteristics</i> |                        |                        |                       |                       |                        |                        |
| Population (logged)                                                      | -0.0335<br>(0.4976)    | -0.1781<br>(0.4747)    | 0.6723<br>(0.5897)    | 1.3467***<br>(0.4802) | 0.0316<br>(0.4873)     | 0.0331<br>(0.4635)     |
| # Households (logged)                                                    | -0.0998<br>(0.6221)    | 0.0174<br>(0.5930)     | 0.6007<br>(0.6944)    | -0.7765<br>(0.4869)   | 0.2002<br>(0.6211)     | -0.1617<br>(0.5743)    |
| Median family income (logged)                                            | -0.4270**<br>(0.2134)  | -0.4286**<br>(0.1910)  | -0.2254<br>(0.2689)   | -0.4729**<br>(0.2076) | -0.4724**<br>(0.2253)  | -0.5335***<br>(0.1897) |
| Unemployment rate                                                        | -0.0302***<br>(0.0092) | -0.0250***<br>(0.0080) | -0.0253*<br>(0.0132)  | -0.0242**<br>(0.0099) | -0.0291***<br>(0.0091) | -0.0270***<br>(0.0079) |
| House vacancy rate                                                       | -0.0057<br>(0.0094)    | -0.0091<br>(0.0087)    | 0.0068<br>(0.0103)    | 0.0062<br>(0.0071)    | -0.0002<br>(0.0095)    | -0.0060<br>(0.0082)    |
| % White population                                                       | -0.0020<br>(0.0078)    | -0.0016<br>(0.0074)    | 0.0159*<br>(0.0090)   | 0.0209***<br>(0.0071) | -0.0002<br>(0.0079)    | 0.0004<br>(0.0074)     |
| % Hispanic population                                                    | 0.0306***<br>(0.0092)  | 0.0299***<br>(0.0087)  | 0.0163<br>(0.0130)    | 0.0116<br>(0.0102)    | 0.0302***<br>(0.0094)  | 0.0286***<br>(0.0086)  |
| % Female                                                                 | -0.0192*<br>(0.0115)   | -0.0188*<br>(0.0103)   | -0.0071<br>(0.0124)   | -0.0080<br>(0.0090)   | -0.0198*<br>(0.0114)   | -0.0198*<br>(0.0102)   |
| Zip code FE                                                              | Yes                    | Yes                    | Yes                   | Yes                   | Yes                    | Yes                    |
| Year-by-month FE                                                         | Yes                    | Yes                    | Yes                   | Yes                   | Yes                    | Yes                    |
| City time trends                                                         | Yes                    | Yes                    | Yes                   | Yes                   | Yes                    | Yes                    |
| Observations                                                             | 14,163                 | 14,163                 | 14,163                | 14,163                | 14,163                 | 14,163                 |
| Adj. R-squared                                                           | 0.9707                 | 0.9746                 | 0.9563                | 0.9694                | 0.9750                 | 0.9783                 |

\*  $p < 0.1$ ; \*\*  $p < 0.05$ ; \*\*\*  $p < 0.01$ . Robust standard errors clustered at the zip code level are shown in parentheses. All continuous variables are winsorized at 1% and 99% levels.

**Table A24. Policy Effects on the Prices Controlling Airbnb Characteristics**

| DV: Median Nightly Rate<br>(logged)                                      | (1)<br>Nonprofessional<br>Host Properties | (2)<br>Professional Host<br>Properties | (3)<br>All Properties  |
|--------------------------------------------------------------------------|-------------------------------------------|----------------------------------------|------------------------|
| 1(Policy) <sub>it</sub>                                                  | 0.0536***<br>(0.0134)                     | -0.0536<br>(0.0774)                    | 0.0401***<br>(0.0125)  |
| # Bedrooms                                                               | 0.1010<br>(0.0671)                        | 0.4306<br>(0.3166)                     | 0.1653***<br>(0.0622)  |
| # Bathrooms                                                              | 0.0590<br>(0.0652)                        | -0.1594<br>(0.3262)                    | 0.0051<br>(0.0571)     |
| Max. guests                                                              | 0.1598***<br>(0.0227)                     | 0.2480**<br>(0.1140)                   | 0.1607***<br>(0.0208)  |
| Security deposits                                                        | 0.0001*<br>(0.0001)                       | 0.0007*<br>(0.0004)                    | 0.0001<br>(0.0001)     |
| Cleaning fee                                                             | 0.0020***<br>(0.0007)                     | 0.0061*<br>(0.0036)                    | 0.0035***<br>(0.0006)  |
| Extra people fee                                                         | 0.0027*<br>(0.0014)                       | 0.0100*<br>(0.0060)                    | 0.0023*<br>(0.0013)    |
| Minimum stay                                                             | -0.0029<br>(0.0033)                       | 0.0473*<br>(0.0252)                    | 0.0052*<br>(0.0031)    |
| # Photos                                                                 | 0.0016<br>(0.0029)                        | -0.0077<br>(0.0154)                    | 0.0031<br>(0.0025)     |
| Business ready status                                                    | -0.0510<br>(0.0917)                       | 0.2254<br>(0.5532)                     | 0.0361<br>(0.0854)     |
| Instant book enabled                                                     | -0.1369*<br>(0.0731)                      | -0.4117<br>(0.4055)                    | -0.1344*<br>(0.0705)   |
| Super host status                                                        | 0.0865<br>(0.0827)                        | -0.0824<br>(0.4627)                    | 0.0871<br>(0.0713)     |
| Response rate %                                                          | -0.0057***<br>(0.0012)                    | 0.0228***<br>(0.0060)                  | -0.0043***<br>(0.0011) |
| <i>ACS Controls: Local socioeconomic and demographic characteristics</i> |                                           |                                        |                        |
| Population (logged)                                                      | -0.0864<br>(0.2943)                       | 0.5468<br>(1.4658)                     | -0.1780<br>(0.2704)    |
| # Households (logged)                                                    | 0.2561<br>(0.3048)                        | -0.7200<br>(1.3843)                    | 0.2806<br>(0.2820)     |
| Median family income (logged)                                            | 0.2826***<br>(0.1037)                     | -0.6515<br>(0.5801)                    | 0.2683***<br>(0.0933)  |
| Unemployment rate                                                        | 0.0027<br>(0.0052)                        | -0.0854**<br>(0.0366)                  | 0.0044<br>(0.0052)     |
| House vacancy rate                                                       | -0.0028<br>(0.0036)                       | 0.0237<br>(0.0227)                     | -0.0001<br>(0.0033)    |
| % White population                                                       | -0.0011<br>(0.0038)                       | -0.0058<br>(0.0266)                    | 0.0019<br>(0.0035)     |
| % Hispanic population                                                    | -0.0048<br>(0.0049)                       | 0.0017<br>(0.0304)                     | -0.0054<br>(0.0044)    |
| % Female                                                                 | -0.0008<br>(0.0048)                       | 0.0075<br>(0.0285)                     | 0.0012<br>(0.0040)     |
| Zip code FE                                                              | Yes                                       | Yes                                    | Yes                    |
| Year-by-month FE                                                         | Yes                                       | Yes                                    | Yes                    |
| City time trends                                                         | Yes                                       | Yes                                    | Yes                    |
| Observations                                                             | 14,163                                    | 14,163                                 | 14,163                 |
| Adj. R-squared                                                           | 0.8148                                    | 0.7068                                 | 0.8679                 |

\*  $p < 0.1$ ; \*\*  $p < 0.05$ ; \*\*\*  $p < 0.01$ . Robust standard errors clustered at the zip code level are shown in parentheses. All continuous variables are winsorized at 1% and 99% levels.

**Table A25. Policy Effects on the Reservations (Medians)**

| DVs: Median Reservation Days<br>(logged)                                 | (1)<br>Nonprofessional<br>Host Properties | (2)<br>Professional<br>Host Properties | (3)<br>All Properties |
|--------------------------------------------------------------------------|-------------------------------------------|----------------------------------------|-----------------------|
| 1(Policy) <sub>it</sub>                                                  | 0.0336<br>(0.0439)                        | 0.1332**<br>(0.0566)                   | 0.0858**<br>(0.0422)  |
| <i>ACS Controls: Local socioeconomic and demographic characteristics</i> |                                           |                                        |                       |
| Population (logged)                                                      | -0.8428<br>(0.7528)                       | 0.3837<br>(1.1193)                     | -0.5387<br>(0.6949)   |
| # Households (logged)                                                    | 0.8313<br>(0.9071)                        | 0.2104<br>(1.0556)                     | 0.8047<br>(0.8294)    |
| Median family income (logged)                                            | 0.4172<br>(0.3091)                        | -0.3203<br>(0.4998)                    | 0.2372<br>(0.3580)    |
| Unemployment rate                                                        | 0.0212<br>(0.0145)                        | -0.0056<br>(0.0215)                    | 0.0359**<br>(0.0153)  |
| House vacancy rate                                                       | 0.0017<br>(0.0109)                        | -0.0177<br>(0.0143)                    | -0.0067<br>(0.0114)   |
| % White population                                                       | 0.0043<br>(0.0119)                        | 0.0010<br>(0.0163)                     | 0.0048<br>(0.0118)    |
| % Hispanic population                                                    | -0.0034<br>(0.0136)                       | 0.0236<br>(0.0205)                     | -0.0020<br>(0.0143)   |
| % Female                                                                 | -0.0011<br>(0.0151)                       | 0.0036<br>(0.0175)                     | 0.0077<br>(0.0159)    |
| Zip code FE                                                              | Yes                                       | Yes                                    | Yes                   |
| Year-by-month FE                                                         | Yes                                       | Yes                                    | Yes                   |
| City time trends                                                         | Yes                                       | Yes                                    | Yes                   |
| Observations                                                             | 14,163                                    | 14,163                                 | 14,163                |
| Adj. R-squared                                                           | 0.5770                                    | 0.6147                                 | 0.5898                |

\*  $p < 0.1$ ; \*\*  $p < 0.05$ ; \*\*\*  $p < 0.01$ . Robust standard errors clustered at the zip code level are shown in parentheses. All continuous variables are winsorized at 1% and 99% levels.

**Table A26. Policy Effects on the Revenue (Medians)**

|                                                                          | (1)                                | (2)                             | (3)                   |
|--------------------------------------------------------------------------|------------------------------------|---------------------------------|-----------------------|
| D.V.s: Median Revenue (logged)                                           | Nonprofessional<br>Host Properties | Professional<br>Host Properties | All Properties        |
| 1(Policy) <sub>it</sub>                                                  | -0.0155<br>(0.1262)                | 0.1573<br>(0.1509)              | 0.0494<br>(0.1249)    |
| <i>ACS Controls: Local socioeconomic and demographic characteristics</i> |                                    |                                 |                       |
| Population (logged)                                                      | -2.5985<br>(2.0109)                | 1.0625<br>(2.9581)              | -2.0620<br>(1.8870)   |
| # Households (logged)                                                    | 2.4772<br>(2.2238)                 | -0.7146<br>(2.7583)             | 2.4714<br>(2.1068)    |
| Median family income (logged)                                            | 0.5651<br>(0.8210)                 | -1.8672<br>(1.2290)             | -0.2068<br>(0.8852)   |
| Unemployment rate                                                        | 0.0772**<br>(0.0367)               | -0.0340<br>(0.0580)             | 0.1153***<br>(0.0375) |
| House vacancy rate                                                       | -0.0197<br>(0.0282)                | -0.0310<br>(0.0380)             | -0.0346<br>(0.0295)   |
| % White population                                                       | -0.0100<br>(0.0295)                | 0.0104<br>(0.0461)              | -0.0089<br>(0.0302)   |
| % Hispanic population                                                    | 0.0094<br>(0.0361)                 | 0.0540<br>(0.0532)              | 0.0195<br>(0.0391)    |
| % Female                                                                 | -0.0238<br>(0.0370)                | 0.0214<br>(0.0475)              | 0.0011<br>(0.0411)    |
| Zip code FE                                                              | Yes                                | Yes                             | Yes                   |
| Year-by-month FE                                                         | Yes                                | Yes                             | Yes                   |
| City time trends                                                         | Yes                                | Yes                             | Yes                   |
| Observations                                                             | 14,163                             | 14,163                          | 14,163                |
| Adj. R-squared                                                           | 0.5297                             | 0.6136                          | 0.5350                |

\*  $p < 0.1$ ; \*\*  $p < 0.05$ ; \*\*\*  $p < 0.01$ . Robust standard errors clustered at the zip code level are shown in parentheses. All continuous variables are winsorized at 1% and 99% levels.
